# Supplementary material for: Cobalt-catalyzed regio- and stereoselective intermolecular enyne coupling: an efficient route to 1,3-diene derivatives
Source: Royal Society of Chemistry journal article supplement (doi:10.1039/b920071a), 2010-01-01

# Cobalt-catalyzed regio- and stereoselective intermolecular enyne coupling: an efficient synthesis of 1,3-diene derivatives

*Subramaniyan Mannathan and Chien-Hong Cheng\**

Department of Chemistry, National Tsing Hua University, Hsinchu 30013, Taiwan

[chcheng@mx.nthu.edu.tw](mailto:chcheng@mx.nthu.edu.tw)

## Supporting Information

### Table of Contents

|              |                                                                           |
|--------------|---------------------------------------------------------------------------|
| Page 2       | General, references and experimental section                              |
| Page 3 – 4   | Optimization studies                                                      |
| Page 4 – 11  | Spectral data                                                             |
| Page 12      | NOE data of compounds <b>3h</b> and <b>3p</b>                             |
| Page 13 – 29 | Copies of <sup>1</sup> H and <sup>13</sup> C NMR spectra of all compounds |

## Experimental section

**General.** All reactions were conducted under nitrogen atmosphere on a dual-manifold Schlenk line unless otherwise mentioned and in oven-dried glass wares. All solvents were dried according to known methods and distilled prior to use.<sup>1</sup> Starting materials 4-phenylbut-3-yn-1-ol (**1f**), 3-(pent-1-ynyl)thiophene (**1d**) and hex-1-ynylbenzene (**1e**) were prepared according to the literature procedure.<sup>2</sup> Others were commercially available and used as purchased.

## References.

1. D. D. Perrin, W. L. F. Armarego, *In Purification of Laboratory Chemicals*, 3rd ed.; Pergamon Press: New York, 1988.
2. C. Molinaro, T. F. Jamison, *J. Am. Chem. Soc.* **2003**, *125*, 8076.

**General procedure for the enyne coupling of alkyne with alkene.** A sealed tube (20 mL) containing CoI<sub>2</sub> (0.0500 mmol, 5 mol%), dppp (0.0500 mmol), zinc powder (0.200 mmol) and ZnI<sub>2</sub> (0.200 mmol) were evacuated and purged with nitrogen gas three times. Freshly distilled CH<sub>2</sub>Cl<sub>2</sub> (1.5 - 2.0 mL) was added and stirred well for 2 min. Then, alkyne (1.00 mmol) and alkene (1.20 mmol) were added via syringes. The reaction mixture was stirred at rt for 24 h and was diluted with dichloromethane and stirred in the air for 10 min. The mixture was filtered through a Celite and silica gel pad and washed with dichloromethane. The filtrate was concentrated and the residue was purified on a silica gel column using hexane or hexane/ethyl acetate as eluent to afford the desired product **3**.

For product **3k**, Co(dppe)Br<sub>2</sub> (0.0500 mmol, 5mol%) was used instead of CoI<sub>2</sub>/dppp in the presence of zinc powder (0.200 mmol) and ZnI<sub>2</sub> (0.200 mmol) using DCE as solvent at 80 °C for 20 h.

For products **3l,m**, the reactions were carried out using Co(dppe)Br<sub>2</sub> (0.0500 mmol, 5 mol%) using dichloromethane as solvent at rt for 36 h in the presence of zinc powder (0.200 mmol) and ZnI<sub>2</sub> (0.200 mmol). For products **3n-p**, reactions were carried out using Co(dppe)Br<sub>2</sub> (0.0500 mmol, 5 mol%) and 2,2-bipyridine (0.0500 mmol, 5 mol%) in the presence of zinc powder (0.200 mmol) and ZnI<sub>2</sub> (0.200 mmol) using dichloromethane as solvent at 50 °C for 24 h. For product **3q**, the reaction was carried out using 5 mol%

Co(dppe)Cl<sub>2</sub> and 5 mol% P(2-furyl)<sub>3</sub> in the presence of zinc powder (0.200 mmol) and ZnI<sub>2</sub> (0.200 mmol) using dichloromethane as solvent at 50 °C for 36 h.

**Optimization studies for cobalt-catalyzed coupling of diphenylacetylene with styrene.<sup>a</sup>**

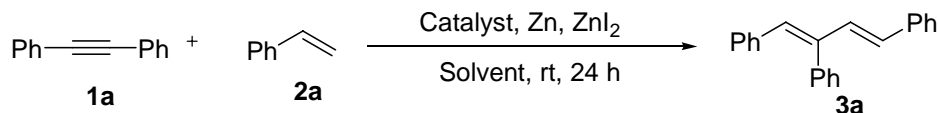

| Entry          | Catalyst                                                      | Solvent                             | Yield(%)  |
|----------------|---------------------------------------------------------------|-------------------------------------|-----------|
| 1 <sup>b</sup> | Co(PPh <sub>3</sub> ) <sub>2</sub> Cl <sub>2</sub> , EtOH     | CH <sub>3</sub> CN                  | 0         |
| 2 <sup>b</sup> | Co(PPh <sub>3</sub> ) <sub>2</sub> I <sub>2</sub> , EtOH      | CH <sub>3</sub> CN                  | 0         |
| 3 <sup>b</sup> | Co(PPh <sub>3</sub> ) <sub>2</sub> I <sub>2</sub> , EtOH      | CH <sub>2</sub> Cl <sub>2</sub>     | 0         |
| 4 <sup>b</sup> | Co(PPh <sub>3</sub> ) <sub>2</sub> I <sub>2</sub> /dppp, EtOH | CH <sub>2</sub> Cl <sub>2</sub>     | 92        |
| 5              | Co(PPh <sub>3</sub> ) <sub>2</sub> I <sub>2</sub> /dppp       | CH <sub>2</sub> Cl <sub>2</sub>     | 92        |
| 6              | Co(PPh <sub>3</sub> ) <sub>2</sub> I <sub>2</sub> /dppe       | CH <sub>2</sub> Cl <sub>2</sub>     | 12        |
| 7              | Co(PPh <sub>3</sub> ) <sub>2</sub> I <sub>2</sub> /dppb       | CH <sub>2</sub> Cl <sub>2</sub>     | 0         |
| 8              | Co(PPh <sub>3</sub> ) <sub>2</sub> I <sub>2</sub> /dppm       | CH <sub>2</sub> Cl <sub>2</sub>     | 0         |
| 9              | Co(dppe)Br <sub>2</sub>                                       | CH <sub>2</sub> Cl <sub>2</sub>     | 76        |
| 10             | Co(dppe)I <sub>2</sub>                                        | CH <sub>2</sub> Cl <sub>2</sub>     | 27        |
| <b>11</b>      | <b>CoI<sub>2</sub>/dppp</b>                                   | <b>CH<sub>2</sub>Cl<sub>2</sub></b> | <b>97</b> |
| 12             | CoI <sub>2</sub> /dppm                                        | CH <sub>2</sub> Cl <sub>2</sub>     | 0         |
| 13             | CoI <sub>2</sub> /dppb                                        | CH <sub>2</sub> Cl <sub>2</sub>     | 0         |
| 14             | Co(dppp)Cl <sub>2</sub>                                       | CH <sub>2</sub> Cl <sub>2</sub>     | 0         |
| 15             | Co(dppe)Cl <sub>2</sub>                                       | CH <sub>2</sub> Cl <sub>2</sub>     | 0         |
| 16             | CoI <sub>2</sub> /dppp (no ZnI <sub>2</sub> )                 | CH <sub>2</sub> Cl <sub>2</sub>     | 0         |
| 17             | No                                                            | CH <sub>2</sub> Cl <sub>2</sub>     | 0         |

<sup>a</sup>All reactions were carried out using alkyne **1a** (1.0 mmol), alkene **2a** (1.2 mmol), cobalt complex (0.0500 mmol), ligand (0.0500 mmol), Zn (0.2000 mmol) and ZnI<sub>2</sub> (0.0200 mmol). <sup>b</sup>0.0200 mmol of ethanol was used.

**Table.** Effect of solvents on cobalt-catalyzed coupling of diphenylacetylene with styrene.<sup>a</sup>

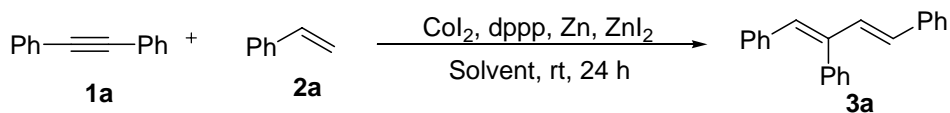

| Entry | Solvent                  | Yield(%) |
|-------|--------------------------|----------|
| 1     | $\text{CH}_3\text{CN}$   | 0        |
| 2     | $\text{CH}_2\text{Cl}_2$ | 97       |
| 3     | DCE <sup>b</sup>         | 73       |
| 4     | THF                      | 0        |
| 5     | DMF                      | 0        |
| 6     | Toluene                  | 18       |

<sup>a</sup>All reactions were carried out using alkyne **1a** (1.0 mmol), alkene **2a** (1.2 mmol),  $\text{CoI}_2$  (0.0500 mmol), dppp (0.0500 mmol), Zn (0.2000 mmol) and  $\text{ZnI}_2$  (0.0200 mmol). <sup>b</sup>1,2-dichloroethane.

The spectral data and copies of  $^1\text{H}$  and  $^{13}\text{C}$  NMR spectra of all compounds are listed below.

**(1*Z*,3*E*)-Buta-1,3-diene-1,2,4-triyltribenzene (3a).**

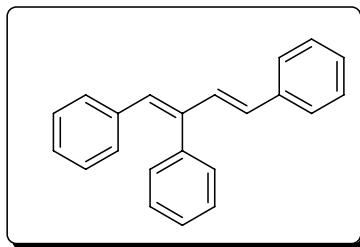

Semisolid;  $^1\text{H}$  NMR (400 MHz,  $\text{CDCl}_3$ ):  $\delta$  7.45 – 7.39 (m, 3 H), 7.36 (d,  $J = 7.6$  Hz, 2 H), 7.29 (t,  $J = 7.2$  Hz, 2 H), 7.24 – 7.16 (m, 4 H), 7.09 – 7.08 (m, 3 H), 6.91 – 6.89 (m, 2 H), 6.73 (s, 1 H), 6.15 (d,  $J = 15.6$  Hz, 1 H);  $^{13}\text{C}$  NMR (100 MHz,  $\text{CDCl}_3$ ):  $\delta$  141.6 (C),

138.2 (C), 137.3 (C), 136.8 (C), 134.2 (CH), 131.9 (CH), 131.2 (CH), 129.5 (2 CH), 129.3 (2 CH), 128.9 (2 CH), 128.5 (2 CH), 127.9 (2 CH), 127.4 (CH), 127.4 (CH), 126.8 (CH), 126.4 (2 CH); HRMS: calcd for C<sub>22</sub>H<sub>18</sub> 282.1409, found 282.1407.

**1-Bromo-4-((1E,3Z)-3,4-diphenylbuta-1,3-dienyl)benzene (3b).**

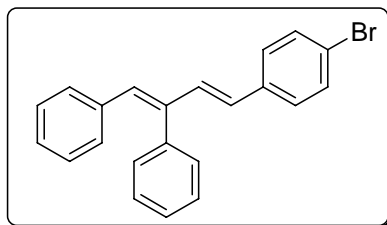

Colorless highly viscous oil; <sup>1</sup>H NMR (400 MHz, CDCl<sub>3</sub>): δ 7.43 – 7.38 (m, 5 H), 7.22 – 7.20 (m, 4 H), 7.12 (d, *J* = 16.0 Hz, 1 H), 7.11 – 7.08 (m, 3 H), 6.90 – 6.89 (m, 2 H), 6.73 (s, 1 H), 6.06 (d, *J* = 16.0 Hz, 1 H); <sup>13</sup>C NMR (100 MHz, CDCl<sub>3</sub>): δ 141.3 (C), 138.0 (C), 136.6 (C), 136.3 (C), 134.9 (CH), 132.5 (CH), 131.6 (2 CH), 129.8 (CH), 129.5 (2 CH), 129.4 (2 CH), 128.9 (2 CH), 128.0 (2 CH), 127.8 (2 CH), 127.5 (CH), 127.0 (CH), 121.0 (C); HRMS: calcd for C<sub>22</sub>H<sub>17</sub>Br 360.0514, found 360.0509.

**(1-Chloro-3-((1E,3Z)-3,4-diphenylbuta-1,3-dienyl)benzene (3c).**

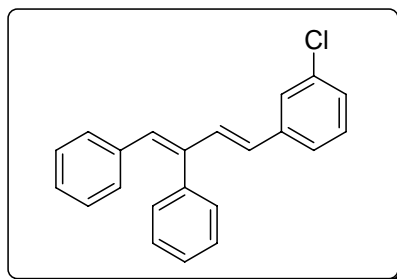

White solid; mp: 82 – 85 °C; <sup>1</sup>H NMR (400 MHz, CDCl<sub>3</sub>): δ 7.48 – 7.40 (m, 3 H), 7.37 (s, 1 H), 7.25 – 7.16 (m, 6 H), 7.12 – 7.11 (m, 3 H), 6.93 (dd, *J* = 6.4 Hz, 2.0 Hz, 2 H), 6.76 (s, 1 H), 6.09 (d, *J* = 16.0 Hz, 1 H); <sup>13</sup>C NMR (100 MHz, CDCl<sub>3</sub>): δ 141.2 (C), 139.3 (C), 137.9 (C), 136.5 (C), 135.5 (CH), 134.4 (C), 132.8 (CH), 129.7 (CH), 129.6 (CH), 129.5 (2 CH), 129.4 (2 CH), 128.9 (2 CH), 128.0 (2 CH), 127.5 (CH), 127.1 (CH), 127.0 (CH), 126.2 (CH), 124.5 (CH); HRMS: calcd for C<sub>22</sub>H<sub>17</sub>Cl 316.1019, found 316.1016.

**((1E,3Z)-3,4-Diphenylbuta-1,3-dienyl)trimethylsilane (3d).**

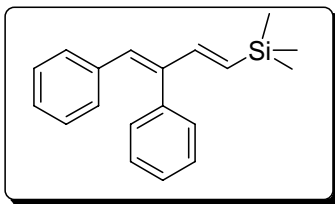

Colorless viscous oil;  $^1\text{H}$  NMR (400 MHz,  $\text{CDCl}_3$ ): 7.27 – 7.26 (m, 3 H), 7.19 (d,  $J = 6.0$  Hz, 2 H), 7.14 – 7.13 (m, 3 H), 7.06 (d,  $J = 8.0$  Hz, 2 H), 6.91 (d,  $J = 14.4$  Hz, 1 H), 6.69 (s, 1 H), 5.74 (d,  $J = 14.0$  Hz, 1 H), 0.16 (s, 9 H);  $^{13}\text{C}$  NMR (100 MHz,  $\text{CDCl}_3$ ):  $\delta$  149.6 (CH), 142.3 (C), 139.1 (C), 136.7 (C), 132.6 (CH), 129.5 (2 CH), 129.3 (2 CH), 128.4 (2 CH), 128.3 (CH), 128.0 (2 CH), 127.4 (CH), 126.8 (CH), 0.5 (3  $\text{CH}_3$ ); HRMS: calcd for  $\text{C}_{19}\text{H}_{22}\text{Si}$  278.1491, found 278.1493.

**1-((1E,3Z)-3,4-Diphenylbuta-1,3-dienyl)-3-methoxybenzene (3e).**

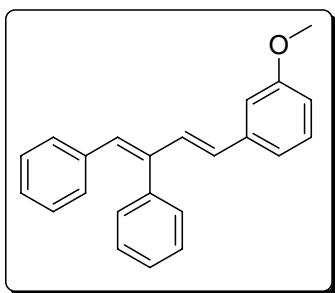

Colorless highly viscous oil;  $^1\text{H}$  NMR (400 MHz,  $\text{CDCl}_3$ ):  $\delta$  7.46 – 7.40 (m, 3 H), 7.24 (d,  $J = 7.6$  Hz, 2 H), 7.20 (d,  $J = 7.6$  Hz, 1 H), 7.18 (d,  $J = 15.6$  Hz, 1 H), 7.10 – 7.09 (m, 3 H), 6.97 (d,  $J = 7.6$  Hz, 1 H), 6.90 (s, 3 H), 6.77 (d,  $J = 8.4$  Hz, 1 H), 6.74 (s, 1 H), 6.13 (d,  $J = 16.0$  Hz, 1 H), 3.80 (s, 3 H);  $^{13}\text{C}$  NMR (100 MHz,  $\text{CDCl}_3$ ):  $\delta$  159.7 (C), 141.5 (C), 138.8 (C), 138.2 (C), 136.7 (C), 134.5 (CH), 132.1 (CH), 131.1 (CH), 129.5 (2 CH), 129.4 (CH), 129.3 (2 CH), 128.9 (2 CH), 127.9 (2 CH), 127.4 (CH), 126.8 (CH), 119.1 (CH), 113.3 (CH), 111.4 (CH), 55.1 ( $\text{CH}_3$ ); HRMS: calcd for  $\text{C}_{23}\text{H}_{20}\text{O}$  312.1514, found 312.1519.

**3-((1E,3Z)-3,4-Diphenylbuta-1,3-dienyl)benzaldehyde (3f).**

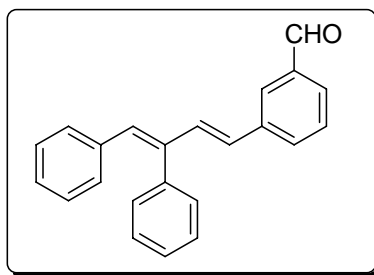

Colorless highly viscous oil,  $^1\text{H}$  NMR (400 MHz,  $\text{CDCl}_3$ ):  $\delta$  9.98 (s, 1 H), 7.85 (s, 1 H), 7.68 (d,  $J = 7.2$  Hz, 1 H), 7.59 (d,  $J = 7.6$  Hz, 1 H), 7.45 – 7.40 (m, 4 H), 7.28 – 7.21 (m, 3 H), 7.09 – 7.08 (m, 3 H), 6.91 (m, 2 H), 6.77 (s, 1 H), 6.16 (d,  $J = 16.0$  Hz, 1 H);  $^{13}\text{C}$  NMR (100 MHz,  $\text{CDCl}_3$ ):  $\delta$  192.3 (CHO), 141.2 (C), 138.4 (C), 137.9 (C), 136.6 (C), 136.5 (C), 135.9 (CH), 133.1 (CH), 132.1 (CH), 129.5 (CH), 129.4 (2 CH), 129.4 (2 CH), 129.2 (CH), 129.0 (2 CH), 128.5 (CH), 128.0 (2 CH), 127.6 (CH), 127.3 (CH), 127.1 (CH); HRMS: calcd for  $\text{C}_{23}\text{H}_{18}\text{O}$  310.1358, found 310.1359.

**((1E,3E)-2-Methylbuta-1,3-diene-1,4-diyl)dibenzene (3g).**

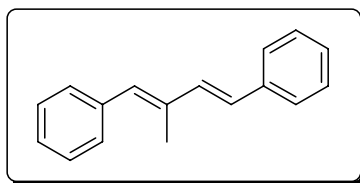

White solid; mp: 56–58 °C;  $^1\text{H}$  NMR (400 MHz,  $\text{CDCl}_3$ ):  $\delta$  7.48 (d,  $J = 8.0$  Hz, 2 H), 7.39 – 7.33 (m, 6 H), 7.24 (m, 2 H), 7.00 (d,  $J = 16.0$  Hz, 1 H), 6.67 (d,  $J = 16.0$  Hz, 1 H), 6.80 (s, 1 H), 2.14 (s, 3 H);  $^{13}\text{C}$  NMR (100 MHz,  $\text{CDCl}_3$ ):  $\delta$  137.8 (C), 137.6 (C), 135.8 (C), 134.1 (CH), 132.2 (CH), 129.2 (2 CH), 128.6 (2 CH), 128.1 (2 CH), 127.9 (CH), 127.2 (CH), 126.6 (CH), 126.3 (2 CH), 13.9 ( $\text{CH}_3$ ); HRMS: calcd for  $\text{C}_{17}\text{H}_{16}$  220.1252, found 220.1258.

**1-Bromo-4-((1E,3E)-3-methyl-4-phenylbuta-1,3-dienyl)benzene (3h).**

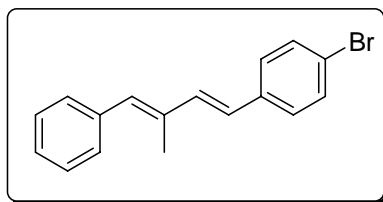

White solid; mp: 112 – 115 °C;  $^1\text{H}$  NMR (400 MHz,  $\text{CDCl}_3$ ):  $\delta$  7.43(d,  $J = 8.4$  Hz, 2 H), 7.37 – 7.29 (m, 6 H), 7.24 – 7.23 (m, 1 H), 6.95 (d,  $J = 15.6$  Hz, 1 H), 6.66 (s, 1 H), 6.56

(d,  $J = 16.0$  Hz, 1 H), 2.10 (s, 3 H);  $^{13}\text{C}$  NMR (100 MHz,  $\text{CDCl}_3$ ):  $\delta$  137.6 (C), 136.5 (C), 135.5 (C), 134.8 (CH), 132.9 (CH), 131.7 (2 CH), 129.2 (2 CH), 128.1 (2 CH), 127.8 (2 CH), 126.7 (CH), 126.6 (CH), 120.9 (C), 13.9 ( $\text{CH}_3$ ); HRMS: calcd for  $\text{C}_{17}\text{H}_{15}\text{Br}$  298.0357, found 298.0364.

**((*1E,3E*)-2-Ethylbuta-1,3-diene-1,4-diyl)dibenzene (3i).**

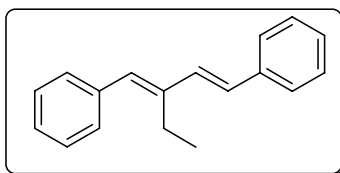

White solid; mp: 75 – 78 °C;  $^1\text{H}$  NMR (400 MHz,  $\text{CDCl}_3$ ):  $\delta$  7.48 (d,  $J = 7.6$  Hz, 2 H), 7.39 – 7.33 (m, 6 H), 7.27 – 7.22 (m, 2 H), 6.88 (d,  $J = 16.4$  Hz, 1 H), 6.70 (d,  $J = 16.4$  Hz, 1 H), 6.61 (s, 1 H), 2.63 (q,  $J = 8.0$  Hz, 2 H), 1.28 (t,  $J = 7.2$  Hz, 3 H);  $^{13}\text{C}$  NMR (100 MHz,  $\text{CDCl}_3$ ):  $\delta$  142.0 (C), 137.7 (C), 137.6 (C), 132.7 (CH), 131.5 (CH), 128.7 (2 CH), 128.6 (2 CH), 128.2 (2 CH), 127.6 (CH), 127.2 (CH), 126.6 (CH), 126.3 (2 CH), 20.3 ( $\text{CH}_2$ ), 13.9 ( $\text{CH}_3$ ); HRMS: calcd for  $\text{C}_{18}\text{H}_{18}$  234.1409, found 243.1411.

**((*1E,3E*)-2-Butylbuta-1,3-diene-1,4-diyl)dibenzene (3j).**

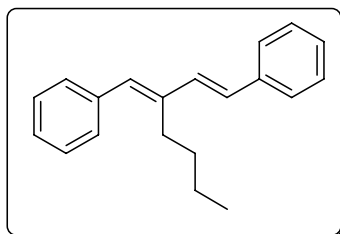

Colorless highly viscous oil,  $^1\text{H}$  NMR (400 MHz,  $\text{CDCl}_3$ ):  $\delta$  7.46 (d,  $J = 7.6$  Hz, 2 H), 7.37 – 7.31 (m, 6 H), 7.26 – 7.20 (m, 2 H), 6.87 (d,  $J = 16.4$  Hz, 1 H), 6.66 (d,  $J = 16.4$  Hz, 1 H), 6.61 (s, 1 H), 2.56 (t,  $J = 8.0$  Hz, 2 H), 1.66 – 1.58 (m, 2 H), 1.50 – 1.42 (m, 2 H), 0.96 (t,  $J = 7.2$  Hz, 3 H);  $^{13}\text{C}$  NMR (100 MHz,  $\text{CDCl}_3$ ):  $\delta$  140.8 (C), 137.7 (C), 137.6 (C), 133.2 (CH), 131.7 (CH), 128.7 (2 CH), 128.6 (2 CH), 128.2 (2 CH), 127.6 (CH), 127.2 (CH), 126.6 (CH), 126.3 (2 CH), 31.4 ( $\text{CH}_2$ ), 27.1 ( $\text{CH}_2$ ), 23.0 ( $\text{CH}_2$ ), 13.9 ( $\text{CH}_3$ ); HRMS: calcd for  $\text{C}_{20}\text{H}_{22}$  262.1722, found.262.1725.

**1-(4-((*E*)-2-((*E*)-Styryl)hex-1-enyl)phenyl)ethanone (3k).**



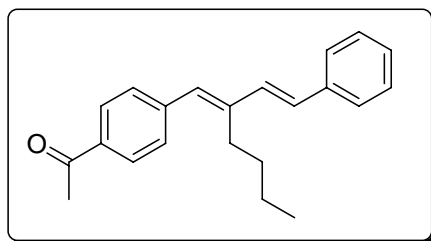

White solid; mp: 61–63 °C;  $^1\text{H}$  NMR (400 MHz,  $\text{CDCl}_3$ ):  $\delta$  7.93 (d,  $J = 8.4$  Hz, 2 H), 7.45 (d,  $J = 7.6$  Hz, 2 H), 7.38 (d,  $J = 8.0$  Hz, 2 H), 7.33 (t,  $J = 7.6$  Hz, 2 H), 7.25 – 7.21 (m, 1 H), 6.85 (d,  $J = 16.0$  Hz, 1 H), 6.70 (d,  $J = 16.0$  Hz, 1 H), 6.60 (s, 1 H), 2.59 (s, 3 H), 2.56 (t,  $J = 6.8$  Hz, 2 H), 1.64 – 1.56 (m, 2 H), 1.48 – 1.39 (m, 2 H), 0.95 (t,  $J = 7.2$  Hz, 3 H);  $^{13}\text{C}$  NMR (100 MHz,  $\text{CDCl}_3$ ):  $\delta$  197.5 (CO), 143.1 (C), 142.7 (C), 137.3 (C), 135.0 (C), 132.7 (CH), 130.4 (CH), 128.9 (CH), 128.8 (2 CH), 128.6 (2 CH), 128.4 (2 CH), 127.6 (CH), 126.5 (2 CH), 31.4 ( $\text{CH}_2$ ), 27.3 ( $\text{CH}_2$ ), 26.5 ( $\text{CH}_3$ ), 23.0 ( $\text{CH}_2$ ), 13.9 ( $\text{CH}_3$ ); HRMS: calcd for  $\text{C}_{22}\text{H}_{24}\text{O}$  304.1827, found. 304.1825.

**3-((*E*)-2-((*E*)-Styryl)pent-1-enyl)thiophene (3l).**

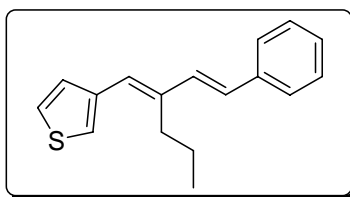

White solid; mp: 101– 103 °C;  $^1\text{H}$  NMR (400 MHz,  $\text{CDCl}_3$ ):  $\delta$  7.44 (d,  $J = 7.6$  Hz, 2 H), 7.34 – 7.20 (m, 3 H), 7.22 – 7.20 (m, 2 H), 7.13 (d,  $J = 5.2$  Hz, 1 H), 6.85 (d,  $J = 16.0$  Hz, 1 H), 6.63 (d,  $J = 16.4$  Hz, 1 H), 6.56 (s, 1 H), 2.60 – 2.56 (m, 2 H), 1.69 – 1.60 (m, 2 H), 1.07 (t,  $J = 7.2$  Hz, 3 H);  $^{13}\text{C}$  NMR (100 MHz,  $\text{CDCl}_3$ ):  $\delta$  139.8 (C), 138.8 (C), 137.7 (C), 133.2 (CH), 128.7 (CH), 128.6 (2 CH), 127.3 (CH), 127.1 (CH), 126.5 (2 CH), 126.3 (CH), 125.1 (CH), 122.8 (CH), 29.8 ( $\text{CH}_2$ ), 22.1 ( $\text{CH}_2$ ), 14.4 ( $\text{CH}_3$ ); HRMS: calcd for  $\text{C}_{17}\text{H}_{18}\text{S}$  254.1129, found 254.1130.

**(3*E*,4*E*)-3-Benzylidene-5-phenylpent-4-en-1-ol. (3m).**

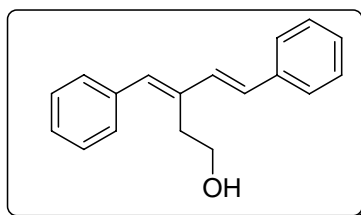

White solid; mp: 71–73 °C;  $^1\text{H}$  NMR (400 MHz,  $\text{CDCl}_3$ ):  $\delta$  7.44 (d,  $J = 7.6$  Hz, 2 H), 7.38 (t,  $J = 7.2$  Hz, 3 H), 7.33 (t,  $J = 8.0$  Hz, 3 H), 7.26 – 7.21 (m, 2 H), 6.90 (d,  $J = 16.4$  Hz, 1 H), 6.77 (s, 1 H), 6.71 (d,  $J = 16.0$  Hz, 1 H), 3.88 (t,  $J = 7.2$  Hz, 2 H), 2.91 (t,  $J = 7.2$  Hz, 2 H);  $^{13}\text{C}$  NMR (100 MHz,  $\text{CDCl}_3$ ):  $\delta$  137.3 (C), 137.1 (C), 136.0 (C), 134.2 (CH), 132.7 (CH), 128.8 (2 CH), 128.6 (2 CH), 128.4 (2 CH), 128.0 (CH), 127.5 (CH), 127.0 (CH), 126.3 (2 CH), 61.7 ( $\text{CH}_2$ ), 30.5 ( $\text{CH}_2$ ); HRMS: calcd for  $\text{C}_{18}\text{H}_{18}\text{O}$  250.1358, found 250.1365.

**(2*E*,4*E*)-Ethyl 3-methyl-5-phenylpenta-2,4-dienoate (3n).**

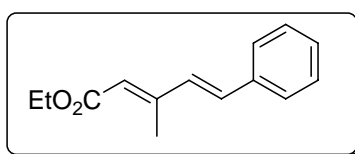

Colorless highly viscous oil,  $^1\text{H}$  NMR (400 MHz,  $\text{CDCl}_3$ ):  $\delta$  7.44 (d,  $J = 7.6$  Hz, 2 H), 7.33 (t,  $J = 7.6$  Hz, 2 H), 7.27 (d,  $J = 6.8$  Hz, 1 H), 6.91 (d,  $J = 16.0$  Hz, 1 H), 6.79 (d,  $J = 16.0$  Hz, 1 H), 5.90 (s, 1 H), 4.18 (q,  $J = 6.8$  Hz, 2 H), 2.40 (s, 3 H), 1.29 (t,  $J = 6.8$  Hz, 3 H);  $^{13}\text{C}$  NMR (100 MHz,  $\text{CDCl}_3$ ):  $\delta$  166.8 ( $\text{CO}_2\text{Et}$ ), 151.8 (C), 136.2 (C), 133.9 (CH), 131.7 (CH), 128.6 (2 CH), 128.4 (CH), 126.9 (2 CH), 119.7 (CH), 59.6 ( $\text{CH}_2$ ), 14.2 ( $\text{CH}_3$ ), 13.6 ( $\text{CH}_3$ ); HRMS: calcd for  $\text{C}_{14}\text{H}_{16}\text{O}_2$  216.1150, found 216.1150.

**(*E*)-Methyl 3-((*E*)-styryl)oct-2-enoate (3o).**

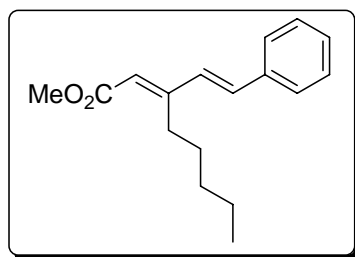

Colorless highly viscous oil,  $^1\text{H}$  NMR (400 MHz,  $\text{CDCl}_3$ ):  $\delta$  7.45 (d,  $J = 7.6$  Hz, 2 H), 7.33 (t,  $J = 7.2$  Hz, 2 H), 7.27 (d,  $J = 7.2$  Hz, 1 H), 6.93 (d,  $J = 16.4$  Hz, 1 H), 6.70 (d,  $J = 16.0$  Hz, 1 H), 5.86 (s, 1 H), 3.71 (s, 3 H), 2.90 (t,  $J = 8.0$  Hz, 2 H), 1.56 – 1.51 (m, 2 H), 1.46 – 1.33 (m, 4 H), 0.91 (t,  $J = 6.8$  Hz, 3 H);  $^{13}\text{C}$  NMR (100 MHz,  $\text{CDCl}_3$ ):  $\delta$  166.8 ( $\text{CO}_2\text{Me}$ ), 157.4 (C), 136.2 (C), 133.6 (CH), 130.6 (CH), 128.6 (2 CH), 128.4 (CH), 126.9 (2 CH), 118.4 (CH), 50.8 ( $\text{CH}_3$ ), 32.1 ( $\text{CH}_2$ ), 29.4 ( $\text{CH}_2$ ), 27.5 ( $\text{CH}_2$ ), 22.4 ( $\text{CH}_2$ ), 13.9 ( $\text{CH}_3$ ); HRMS: calcd for  $\text{C}_{17}\text{H}_{22}\text{O}_2$  258.1620, found 258.1622.

**(2Z,4E)-Ethyl 3,5-diphenylpenta-2,4-dienoate (3p).**

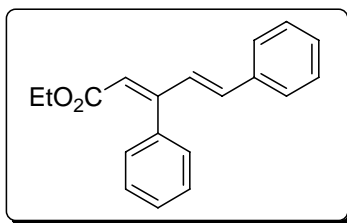

Colorless highly viscous oil,  $^1\text{H}$  NMR (400 MHz,  $\text{CDCl}_3$ ):  $\delta$  7.43 – 7.39 (m, 3 H), 7.37 – 7.34 (m, 2 H), 7.31 – 7.24 (m, 3 H), 7.18 (dd,  $J = 7.6$  Hz, 2.0 Hz, 2 H), 7.03 (d,  $J = 16.0$  Hz, 1 H), 6.35 (d,  $J = 15.6$  Hz, 1 H), 6.06 (s, 1 H), 3.98 (q,  $J = 7.2$  Hz, 2 H), 1.06 (t,  $J = 7.2$  Hz, 3 H);  $^{13}\text{C}$  NMR (100 MHz,  $\text{CDCl}_3$ ):  $\delta$  165.9 ( $\text{CO}_2\text{Et}$ ), 154.9 (C), 138.4 (C), 136.9 (C), 136.1 (C), 131.4 (CH), 128.7 (CH), 128.6 (2 CH), 128.3 (2 CH), 127.8 (2 CH), 127.6 (CH), 127.1 (2 CH), 120.1 (CH), 58.4 ( $\text{CH}_2$ ), 13.9 ( $\text{CH}_3$ ); HRMS: calcd for  $\text{C}_{19}\text{H}_{18}\text{O}_2$  278.1307, found 278.1310.

**1-Bromo-4-((1E,3Z)-5-methoxy-3-(methoxymethyl)penta-1,3-dienyl)benzene (3q).**

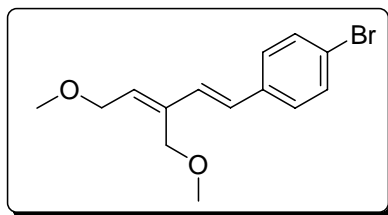

Colorless highly viscous oil,  $^1\text{H}$  NMR (400 MHz,  $\text{CDCl}_3$ ):  $\delta$  7.40 (d,  $J = 8.0$  Hz, 2 H), 7.25 (d,  $J = 8.4$  Hz, 2 H), 6.70 (d,  $J = 16.8$  Hz, 1 H), 6.65 (d,  $J = 16.4$  Hz, 1 H), 5.93 (t,  $J = 6.4$  Hz, 1 H), 4.20 (s, 2 H), 4.15 (d,  $J = 6.8$  Hz, 2 H), 3.35 (s, 3 H), 3.33 (s, 3 H);  $^{13}\text{C}$  NMR (100 MHz,  $\text{CDCl}_3$ ):  $\delta$  136.6 (C), 136.3 (C), 132.9 (CH), 131.6 (2 CH), 130.7 (CH), 127.9 (2 CH), 127.7 (CH), 121.1 (C), 68.6 ( $\text{CH}_2$ ), 66.9 ( $\text{CH}_2$ ), 58.2 ( $\text{CH}_3$ ), 57.8 ( $\text{CH}_3$ ); HRMS: calcd for  $\text{C}_{14}\text{H}_{17}\text{BrO}_2$  296.0412, found 296.0409

**NOE data of compounds 3h and 3p.**

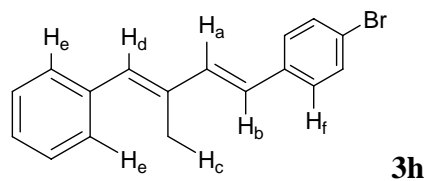

| Irradiation at             | Observed enhancement (%)                                                |
|----------------------------|-------------------------------------------------------------------------|
| H <sub>a</sub> (δ 6.95, d) | H <sub>d</sub> (8.85), no NOE for H <sub>c</sub>                        |
| H <sub>b</sub> (δ 6.56, d) | H <sub>c</sub> (10.42), H <sub>f</sub> (2.19)                           |
| H <sub>c</sub> (δ 2.10, s) | H <sub>b</sub> (3.18)                                                   |
| H <sub>d</sub> (δ 6.66, s) | H <sub>a</sub> (8.17), H <sub>e</sub> (3.37), no NOE for H <sub>c</sub> |

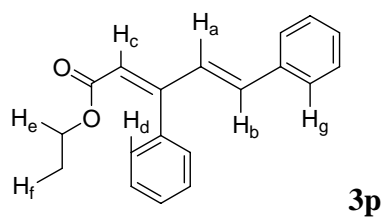

| Irradiation at             | Observed enhancement (%)                                             |
|----------------------------|----------------------------------------------------------------------|
| H <sub>a</sub> (δ 7.03, d) | H <sub>c</sub> (10.73), no NOE for H <sub>e</sub> and H <sub>f</sub> |
| H <sub>b</sub> (δ 6.35, d) | H <sub>g</sub> (5.19)                                                |
| H <sub>c</sub> (δ 6.06, s) | H <sub>a</sub> (9.77), no NOE for H <sub>d</sub>                     |

$^1\text{H}$  and  $^{13}\text{C}$  NMR spectra of compound **3a**

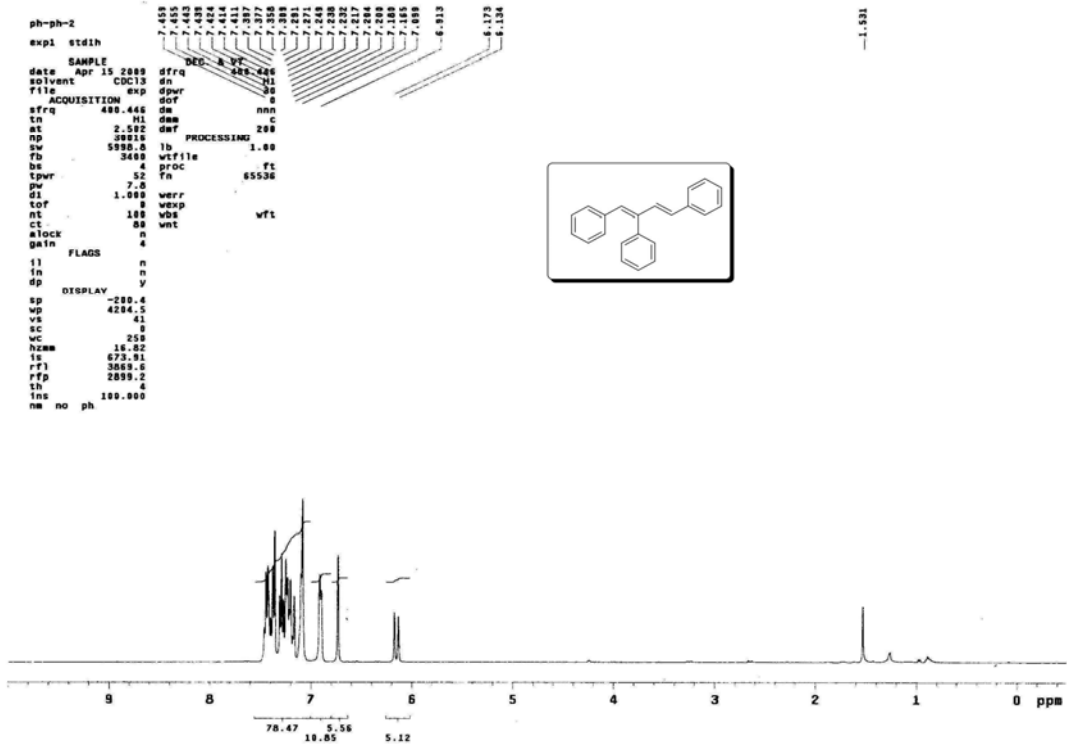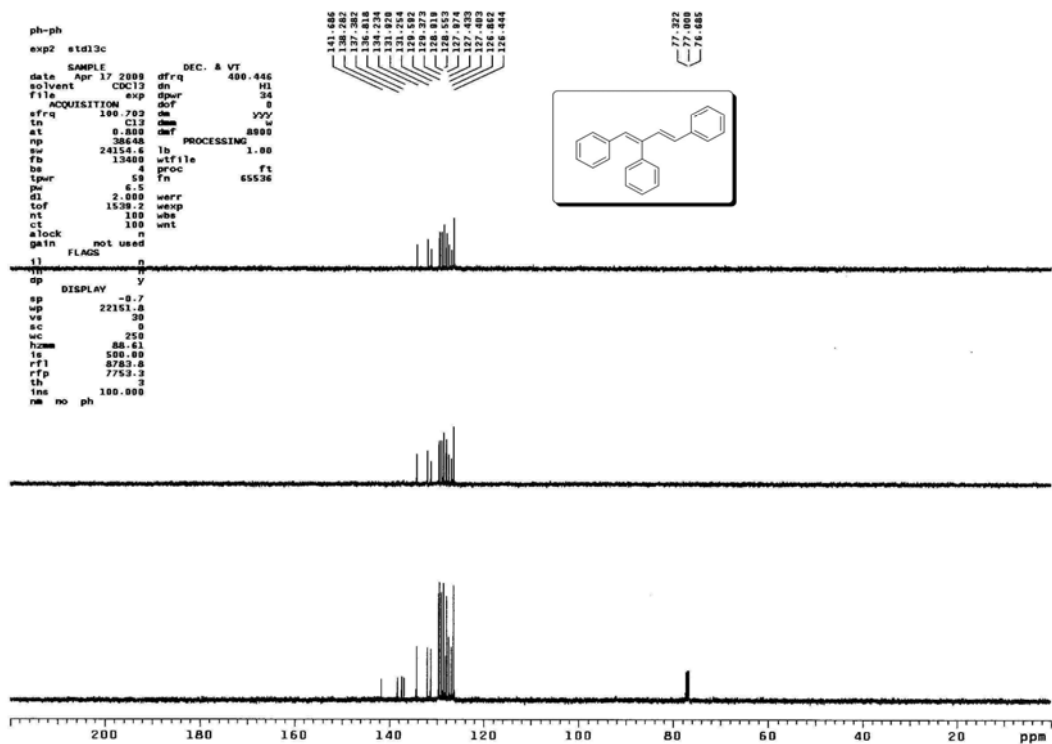

$^1\text{H}$  and  $^{13}\text{C}$  NMR spectra of compound **3b**

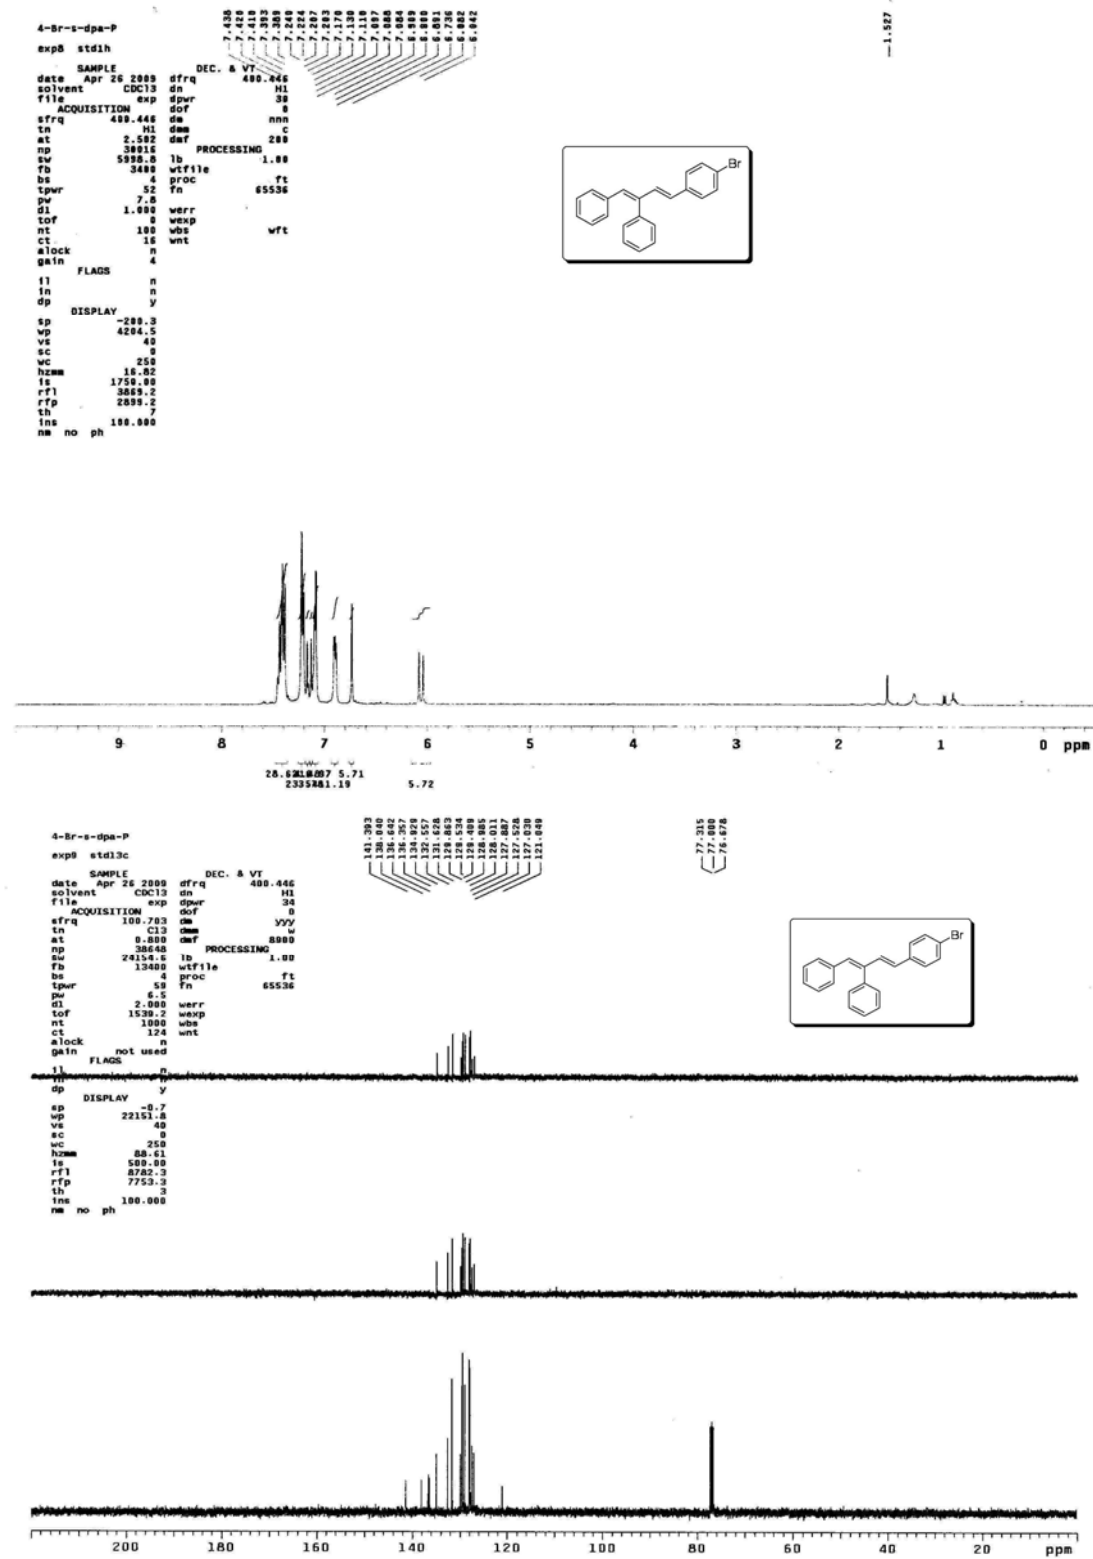

$^1\text{H}$  and  $^{13}\text{C}$  NMR spectra of compound **3c**

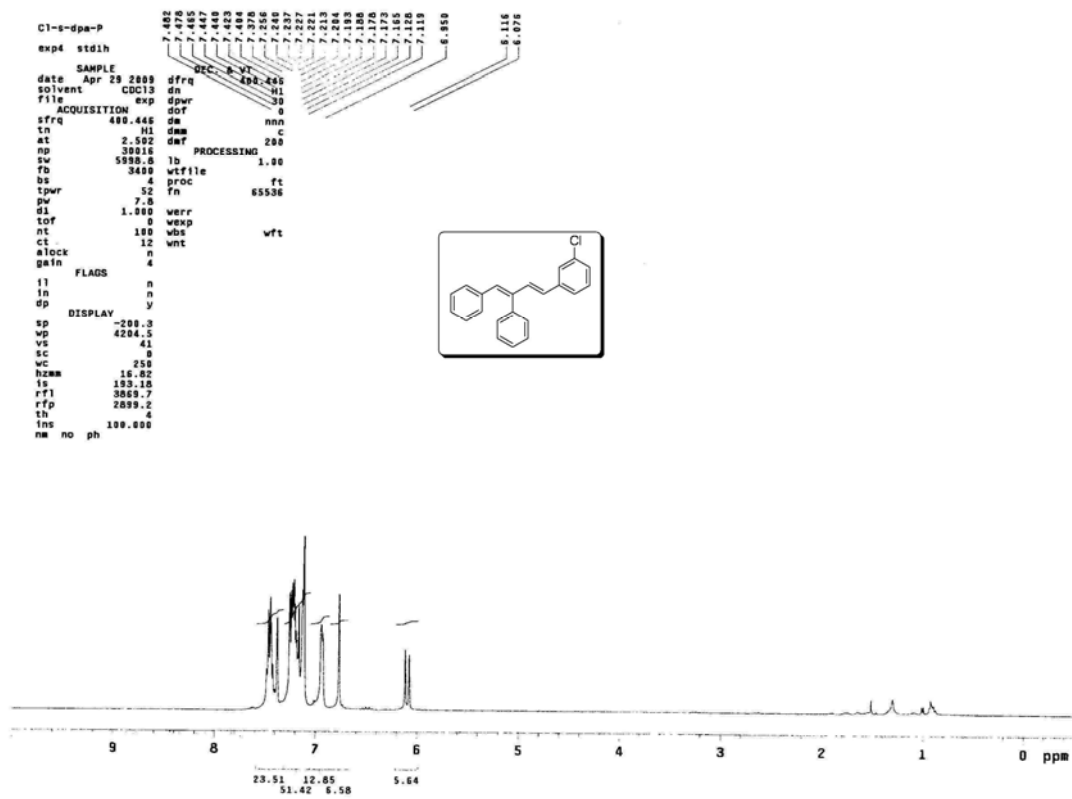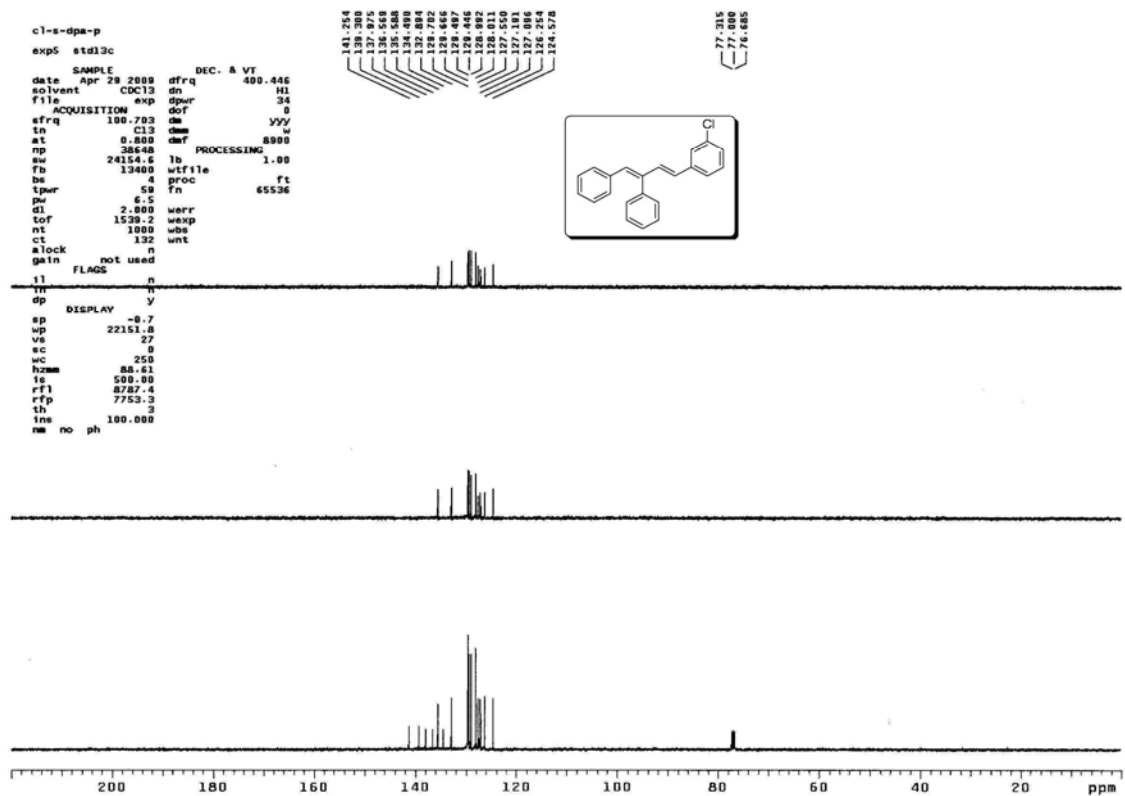

$^1\text{H}$  and  $^{13}\text{C}$  NMR spectra of compound **3d**

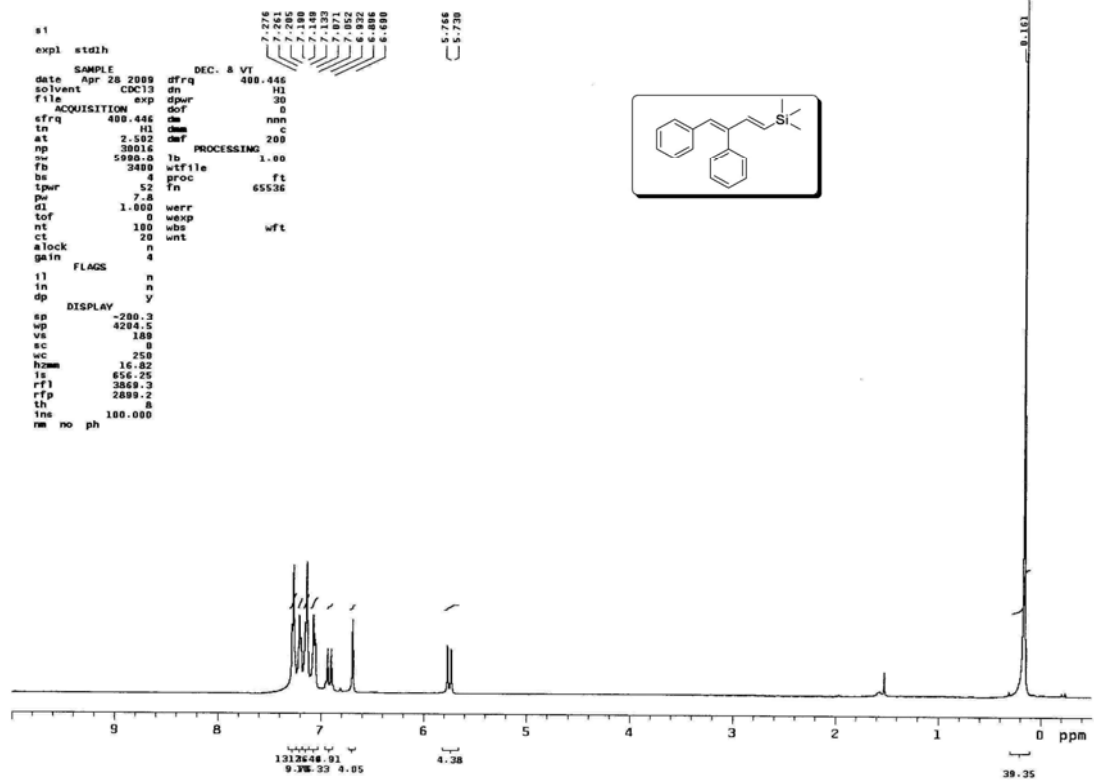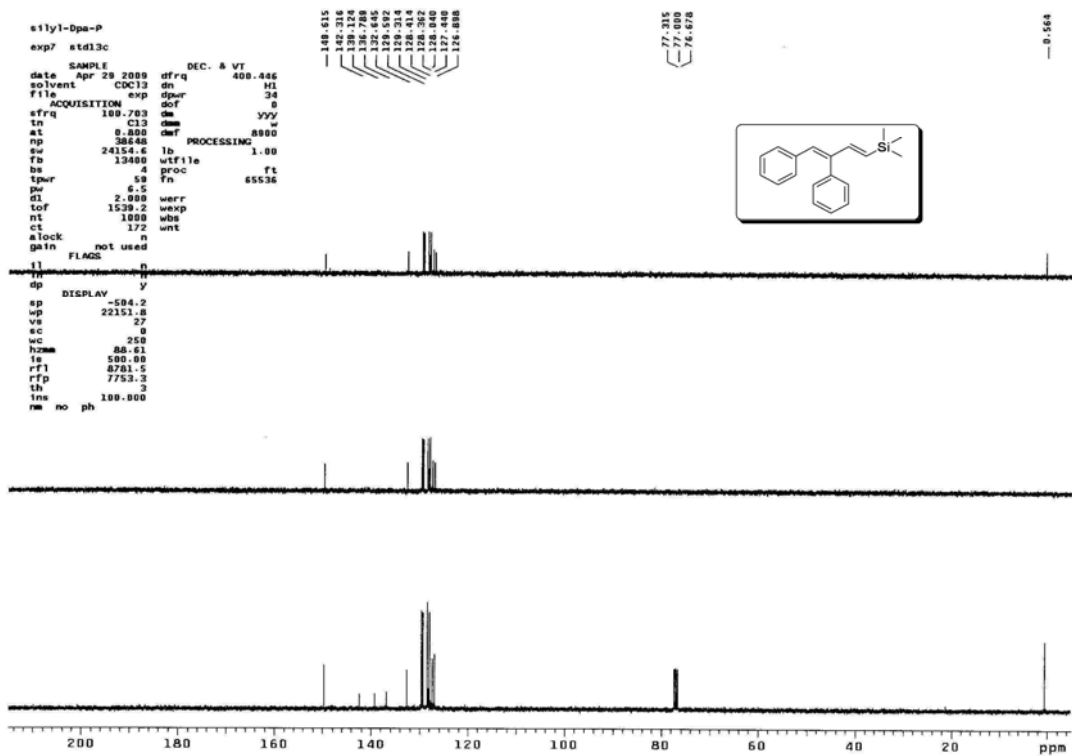



$^1\text{H}$  and  $^{13}\text{C}$  NMR spectra of compound **3e**

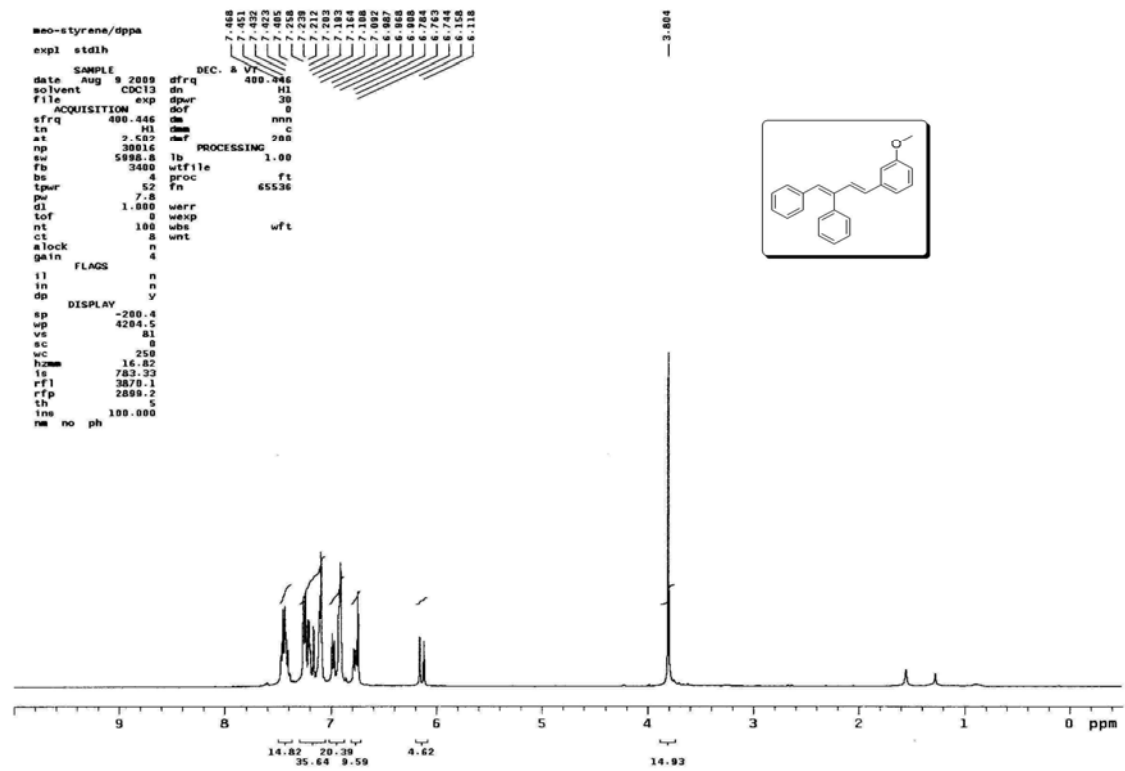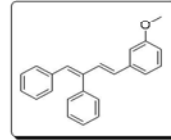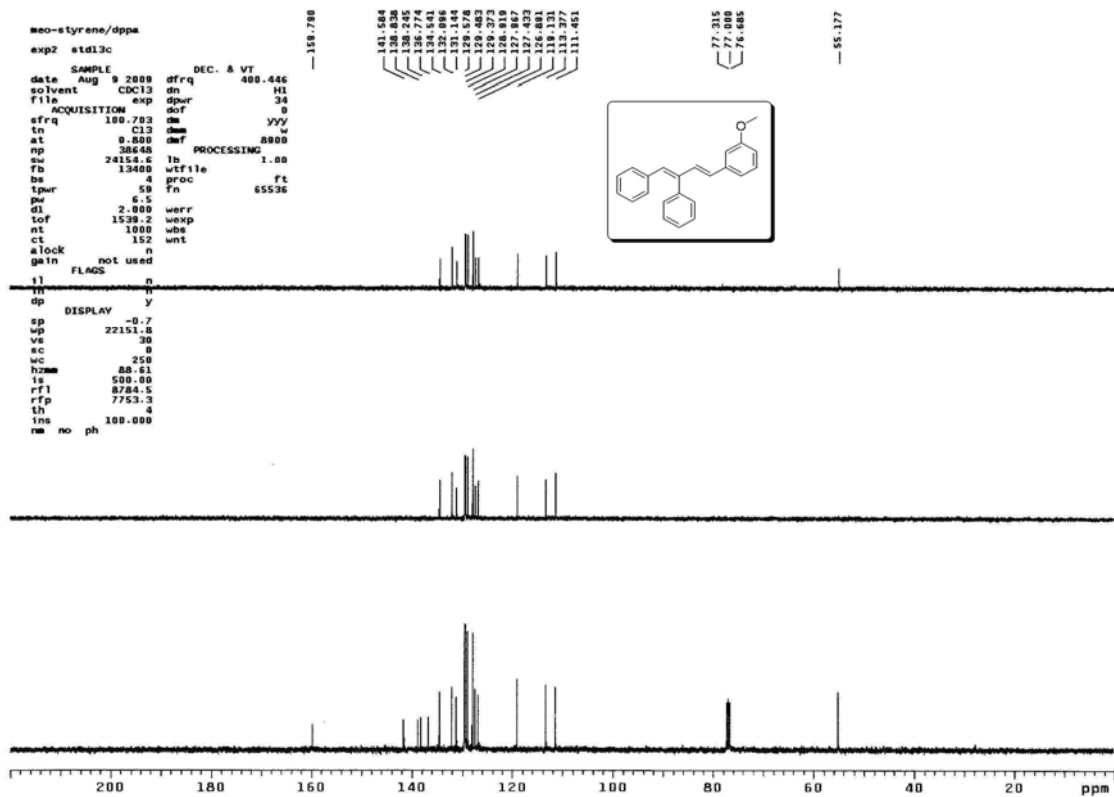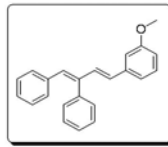

$^1\text{H}$  and  $^{13}\text{C}$  NMR spectra of compound **3f**.

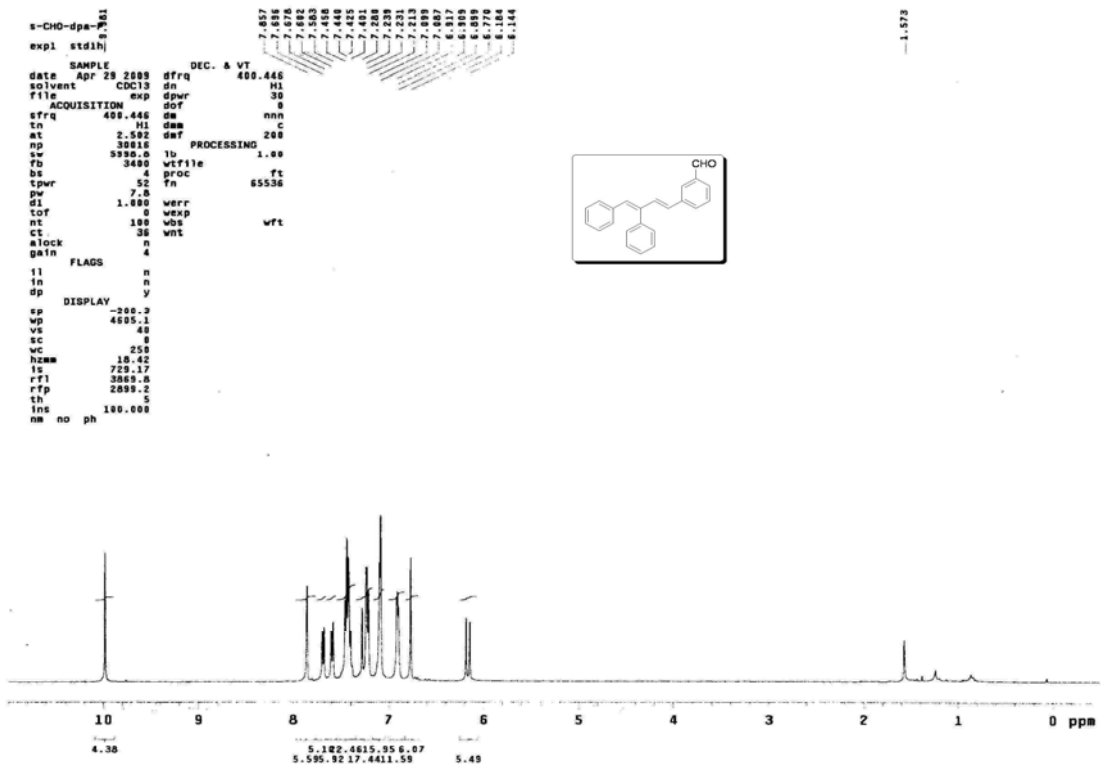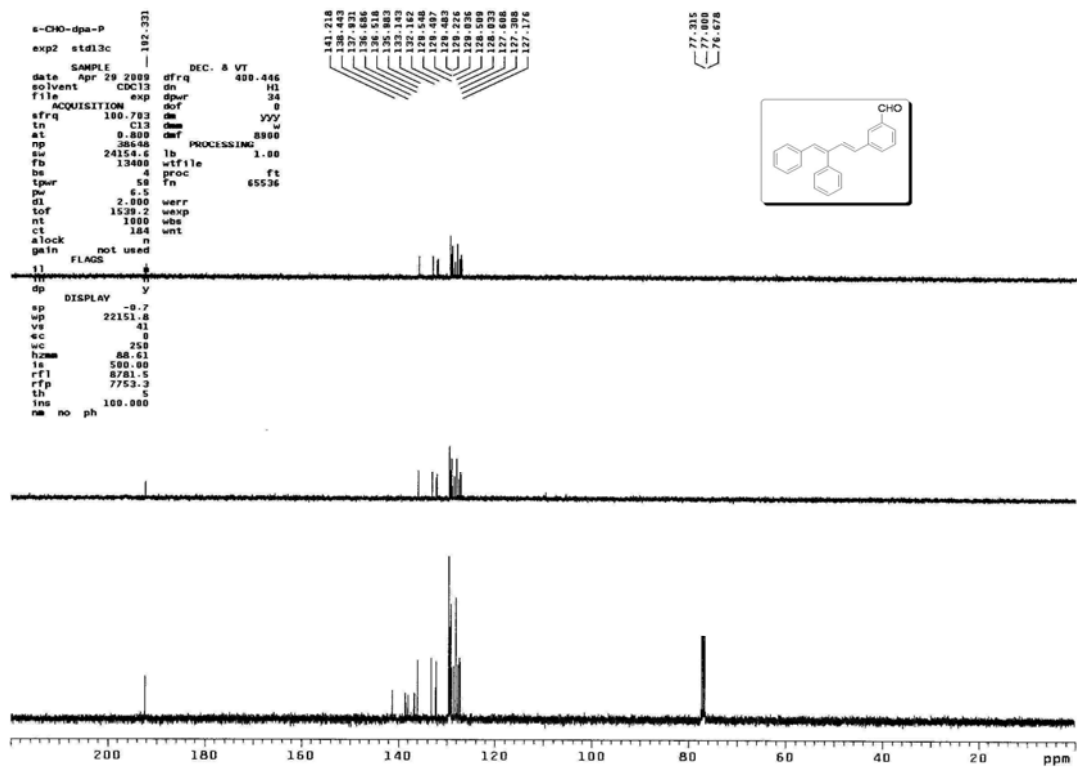

$^1\text{H}$  and  $^{13}\text{C}$  NMR spectra of compound **3g**.

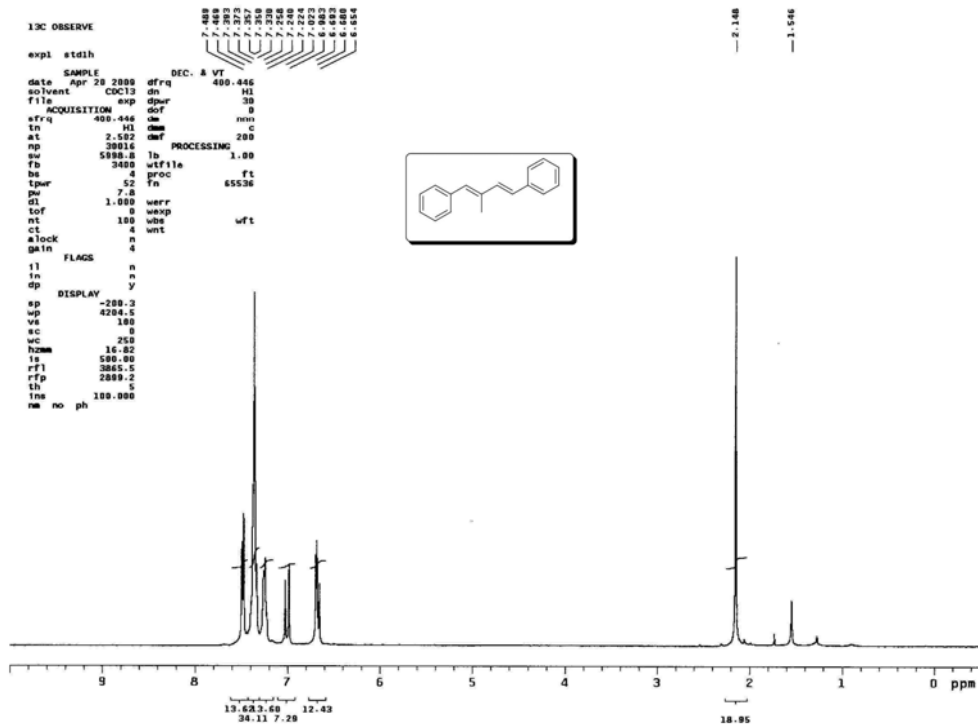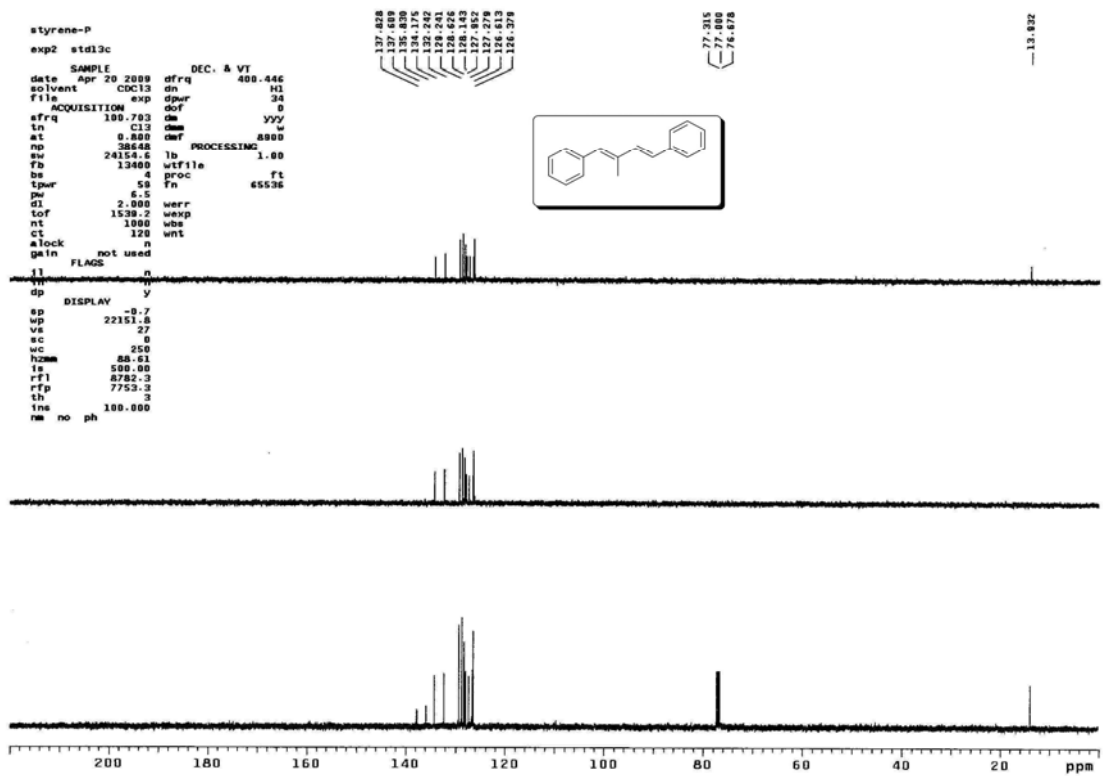

$^1\text{H}$  and  $^{13}\text{C}$  NMR spectra of compound **3h**.

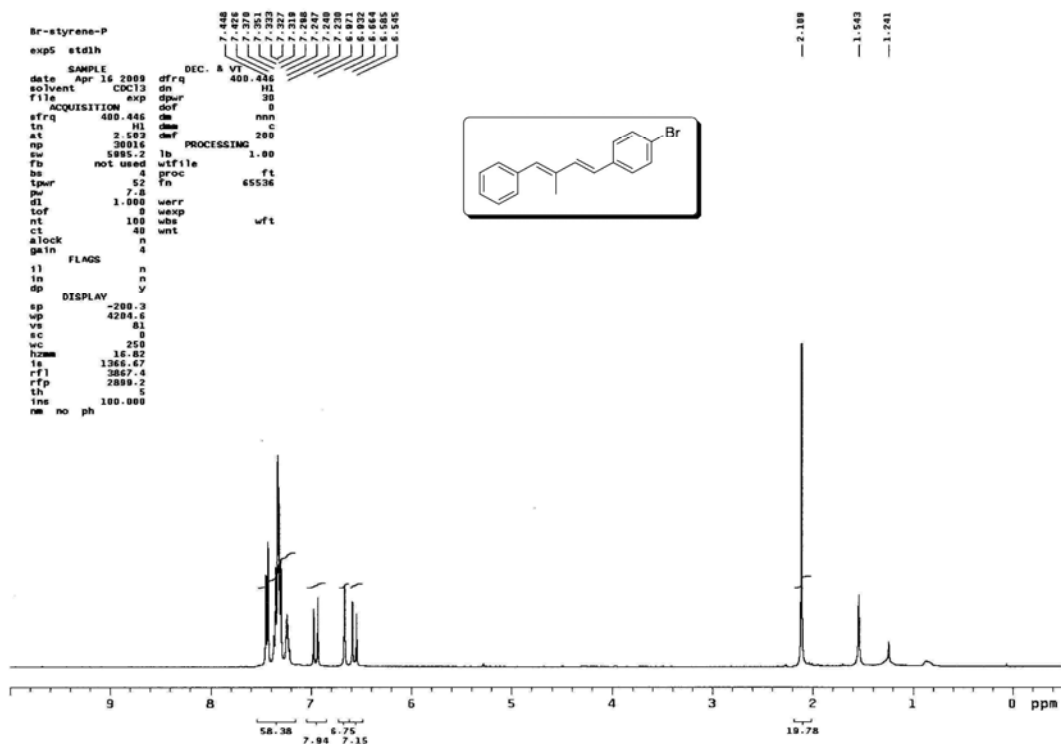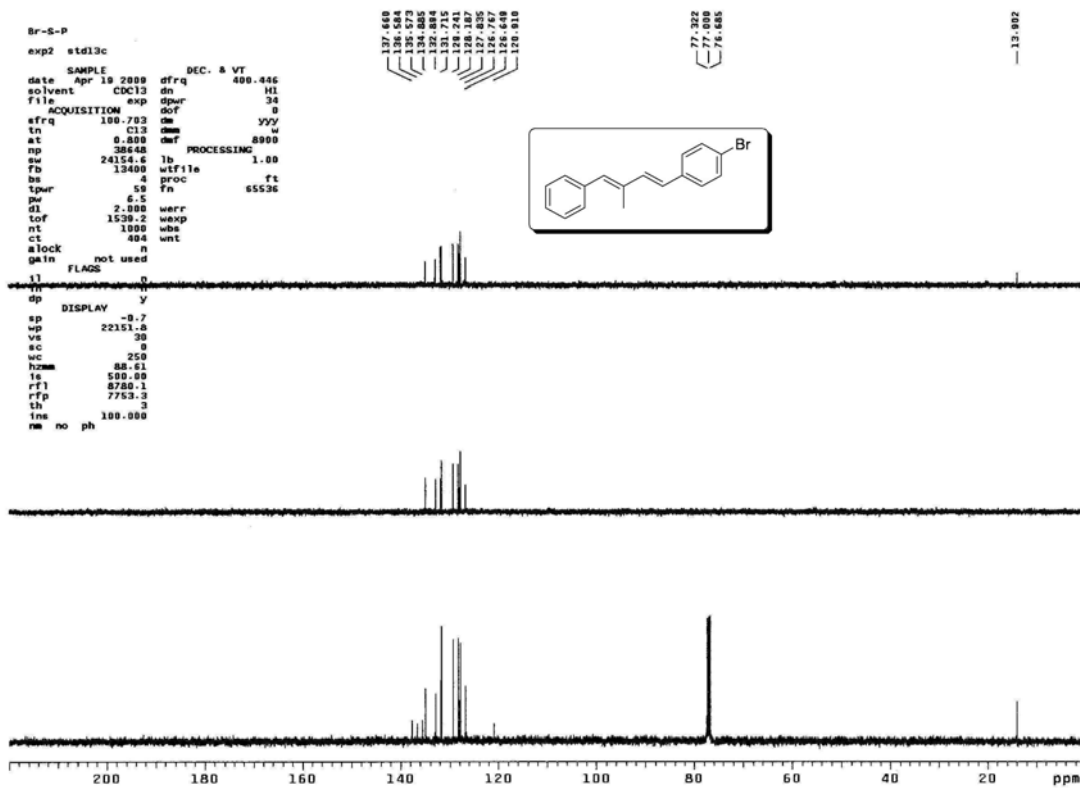

$^1\text{H}$  and  $^{13}\text{C}$  NMR spectra of compound **3i**.

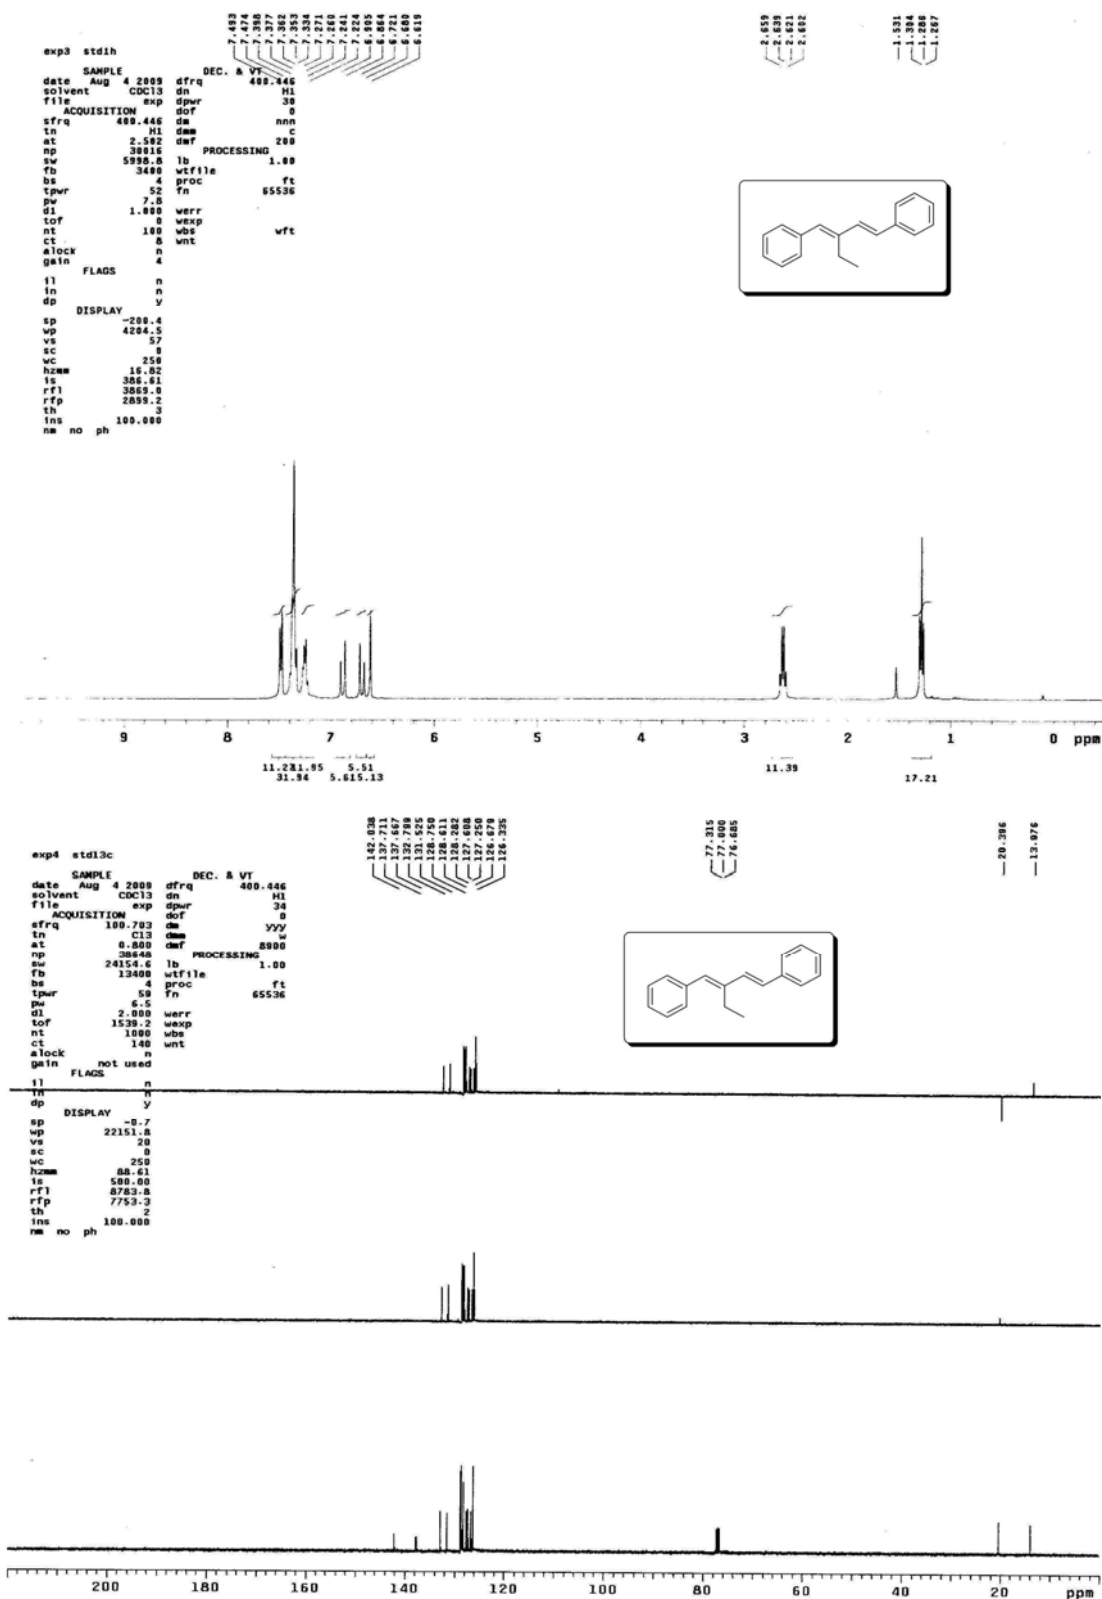

$^1\text{H}$  and  $^{13}\text{C}$  NMR spectra of compound **3j**.

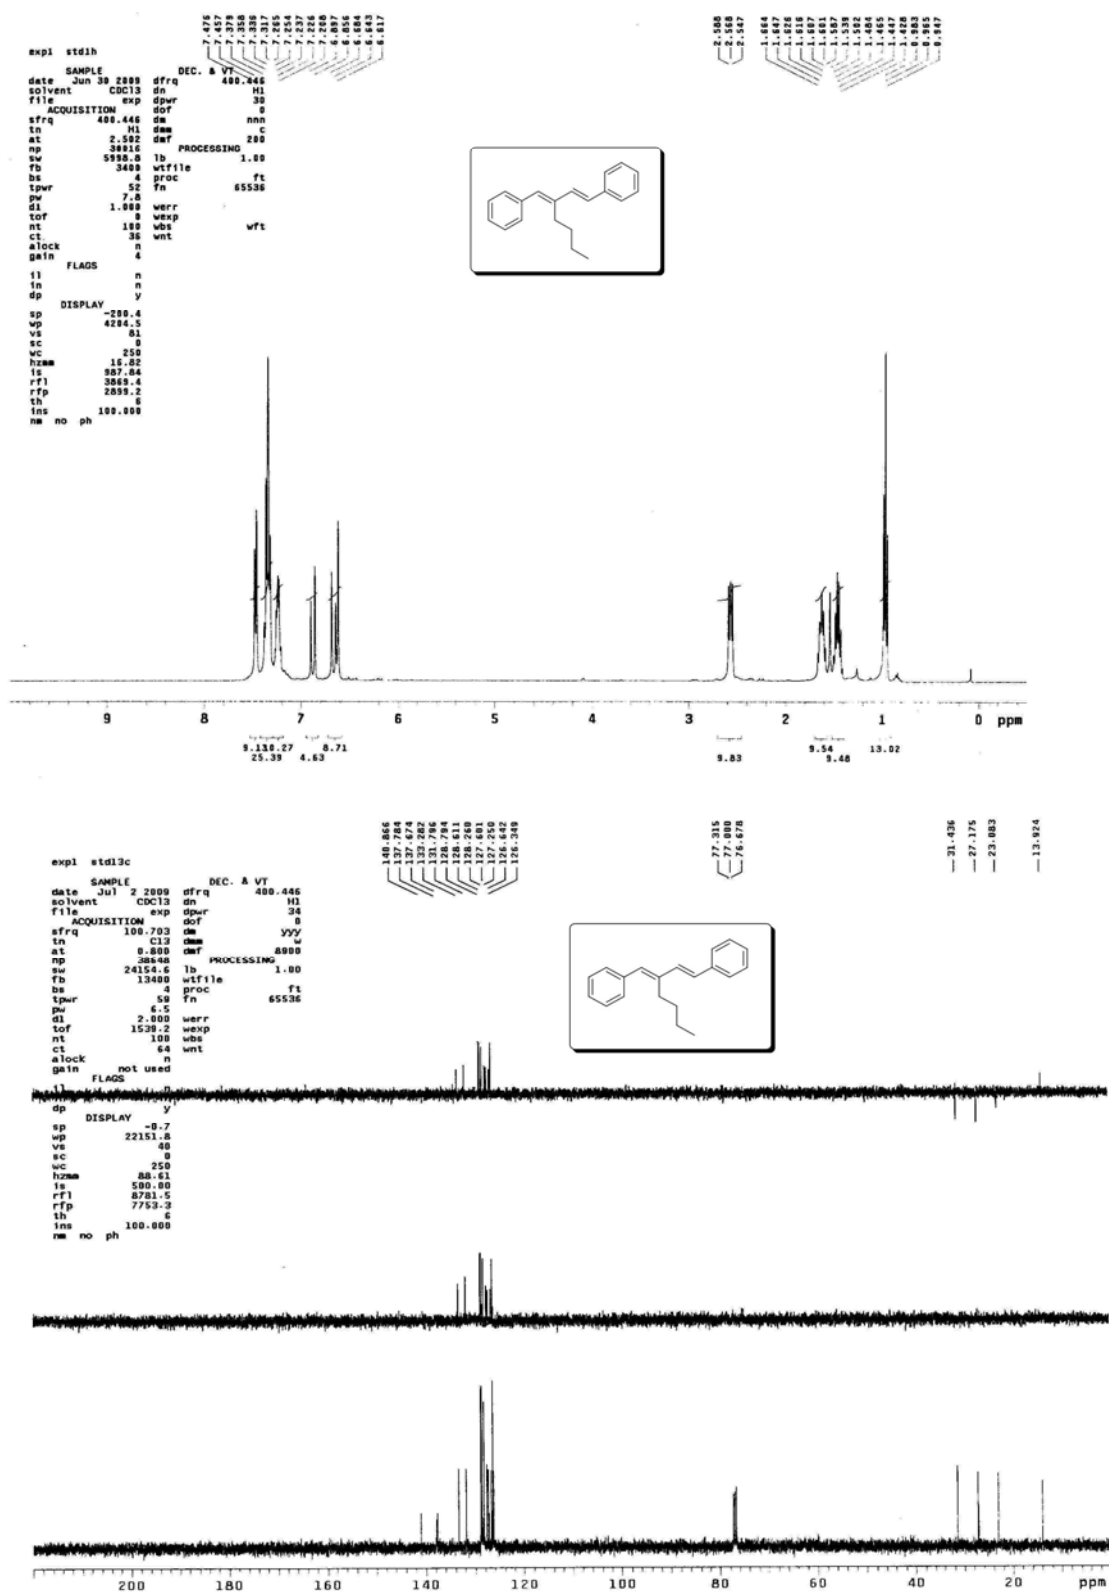

$^1\text{H}$  and  $^{13}\text{C}$  NMR spectra of compound **3k**.

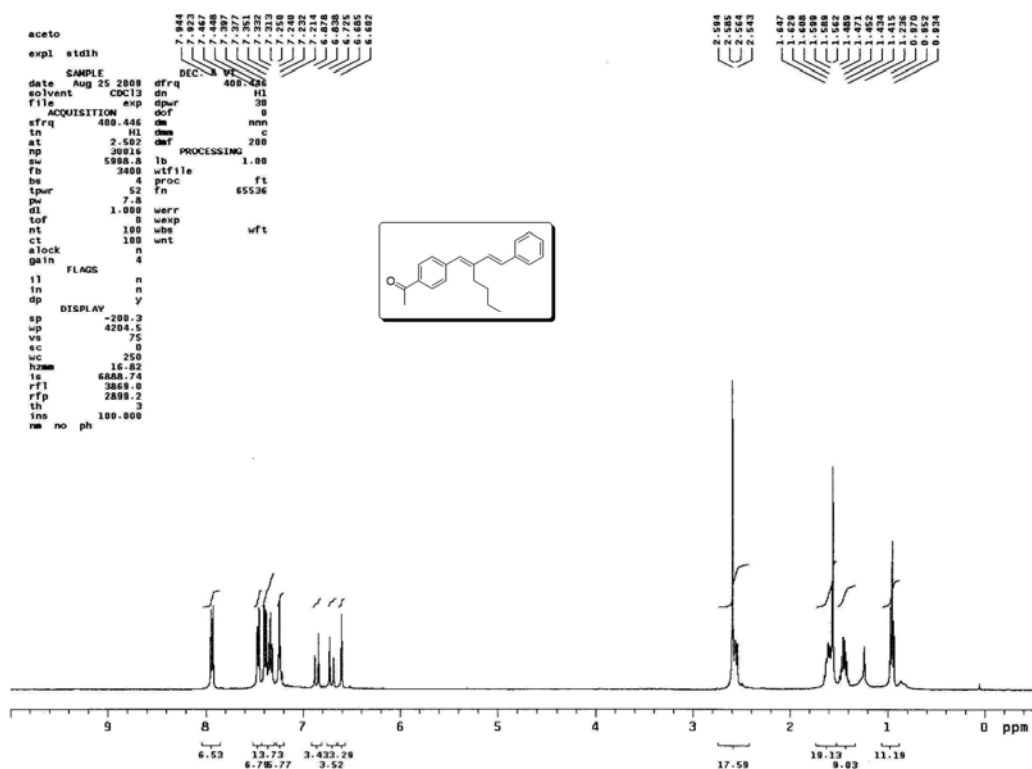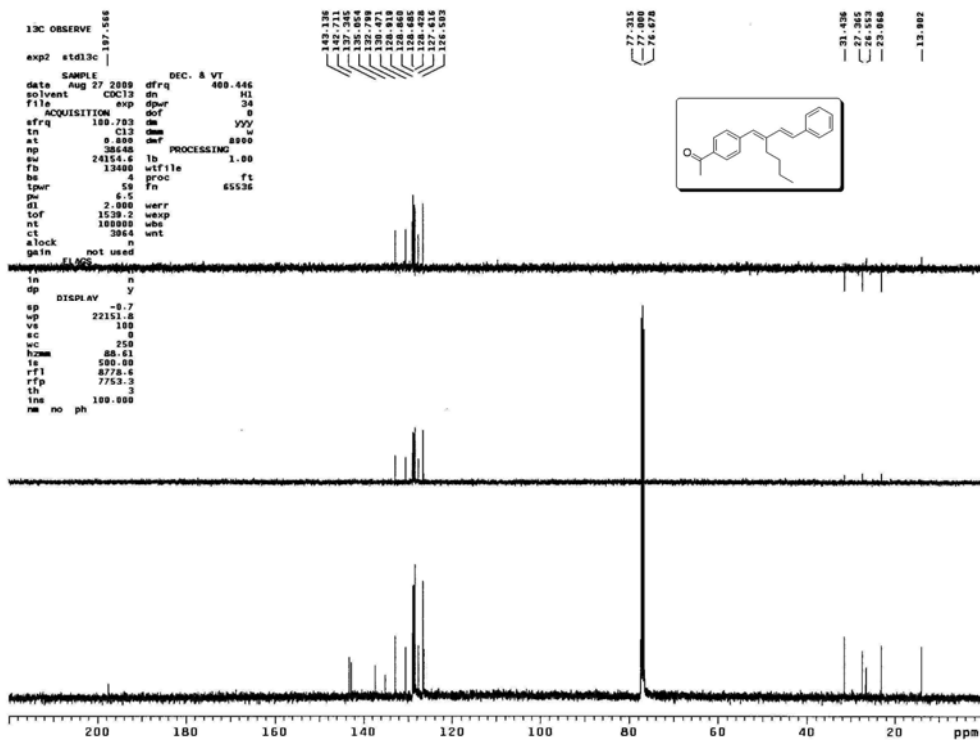

$^1\text{H}$  and  $^{13}\text{C}$  NMR spectra of compound **3l**.

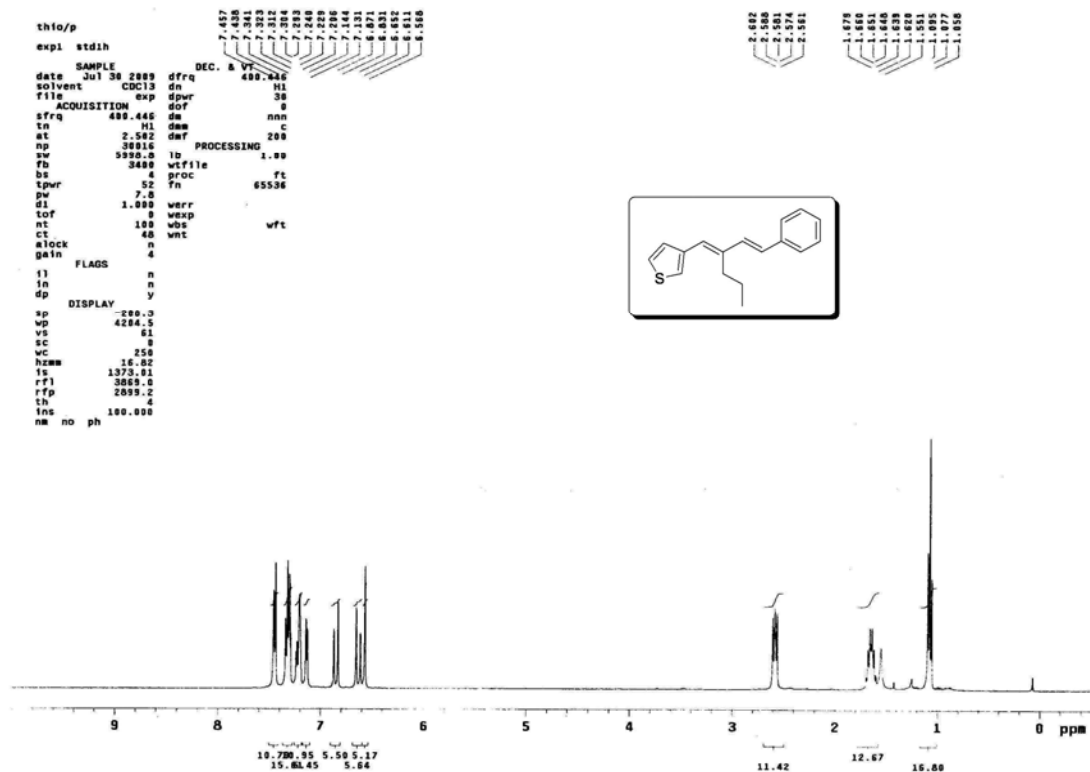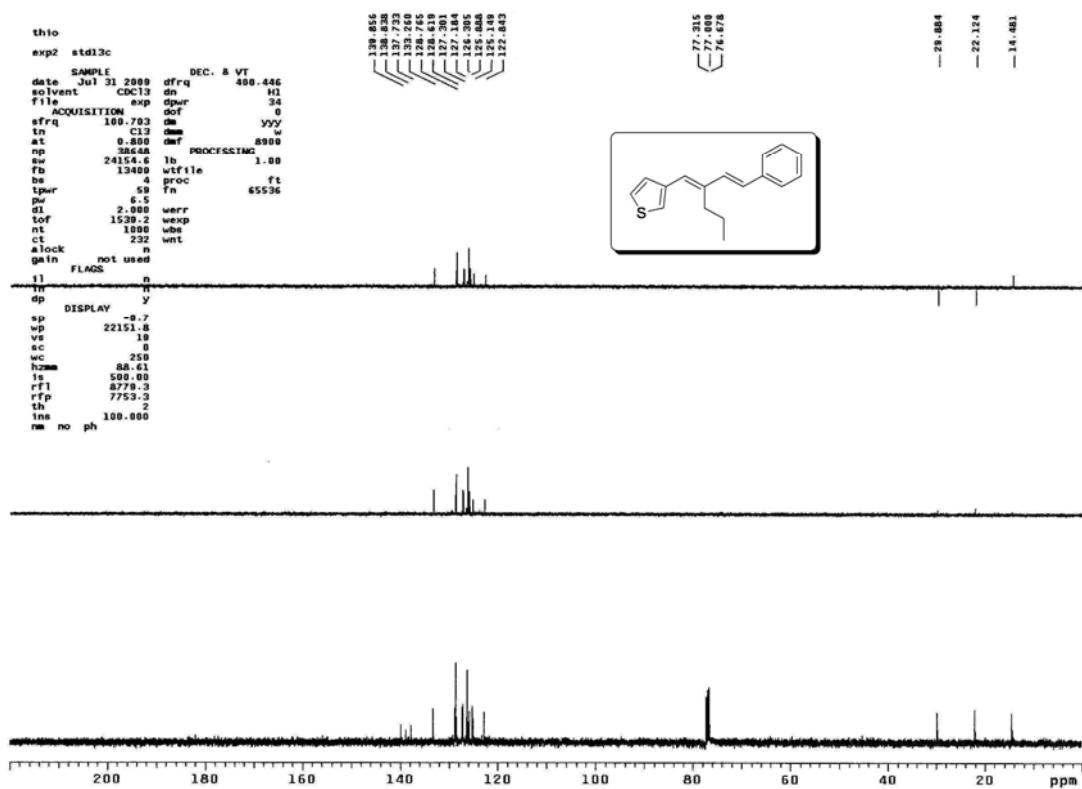



$^1\text{H}$  and  $^{13}\text{C}$  NMR spectra of compound **3m**.

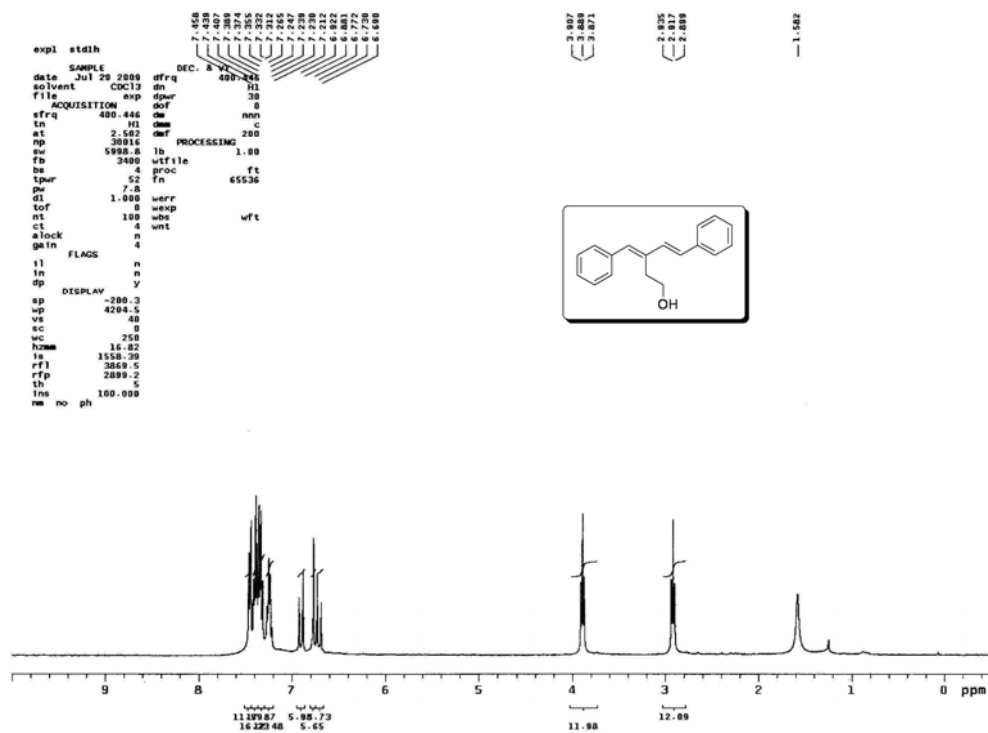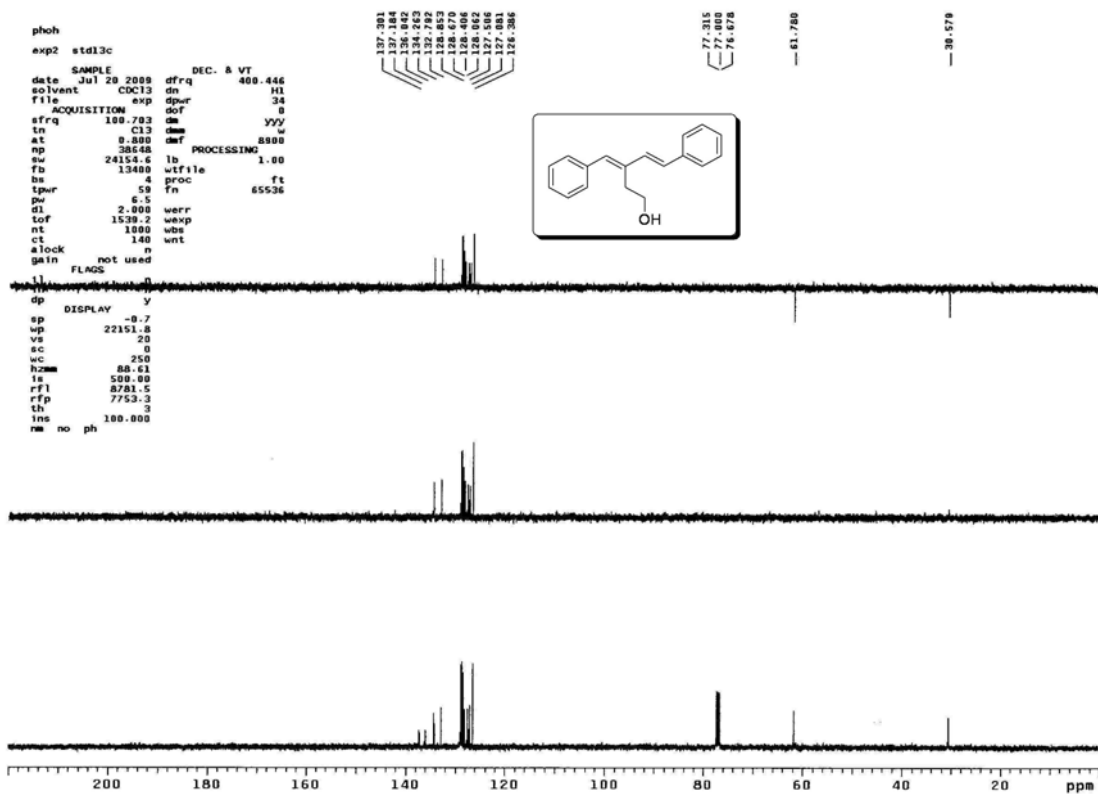

$^1\text{H}$  and  $^{13}\text{C}$  NMR spectra of compound **3n**.

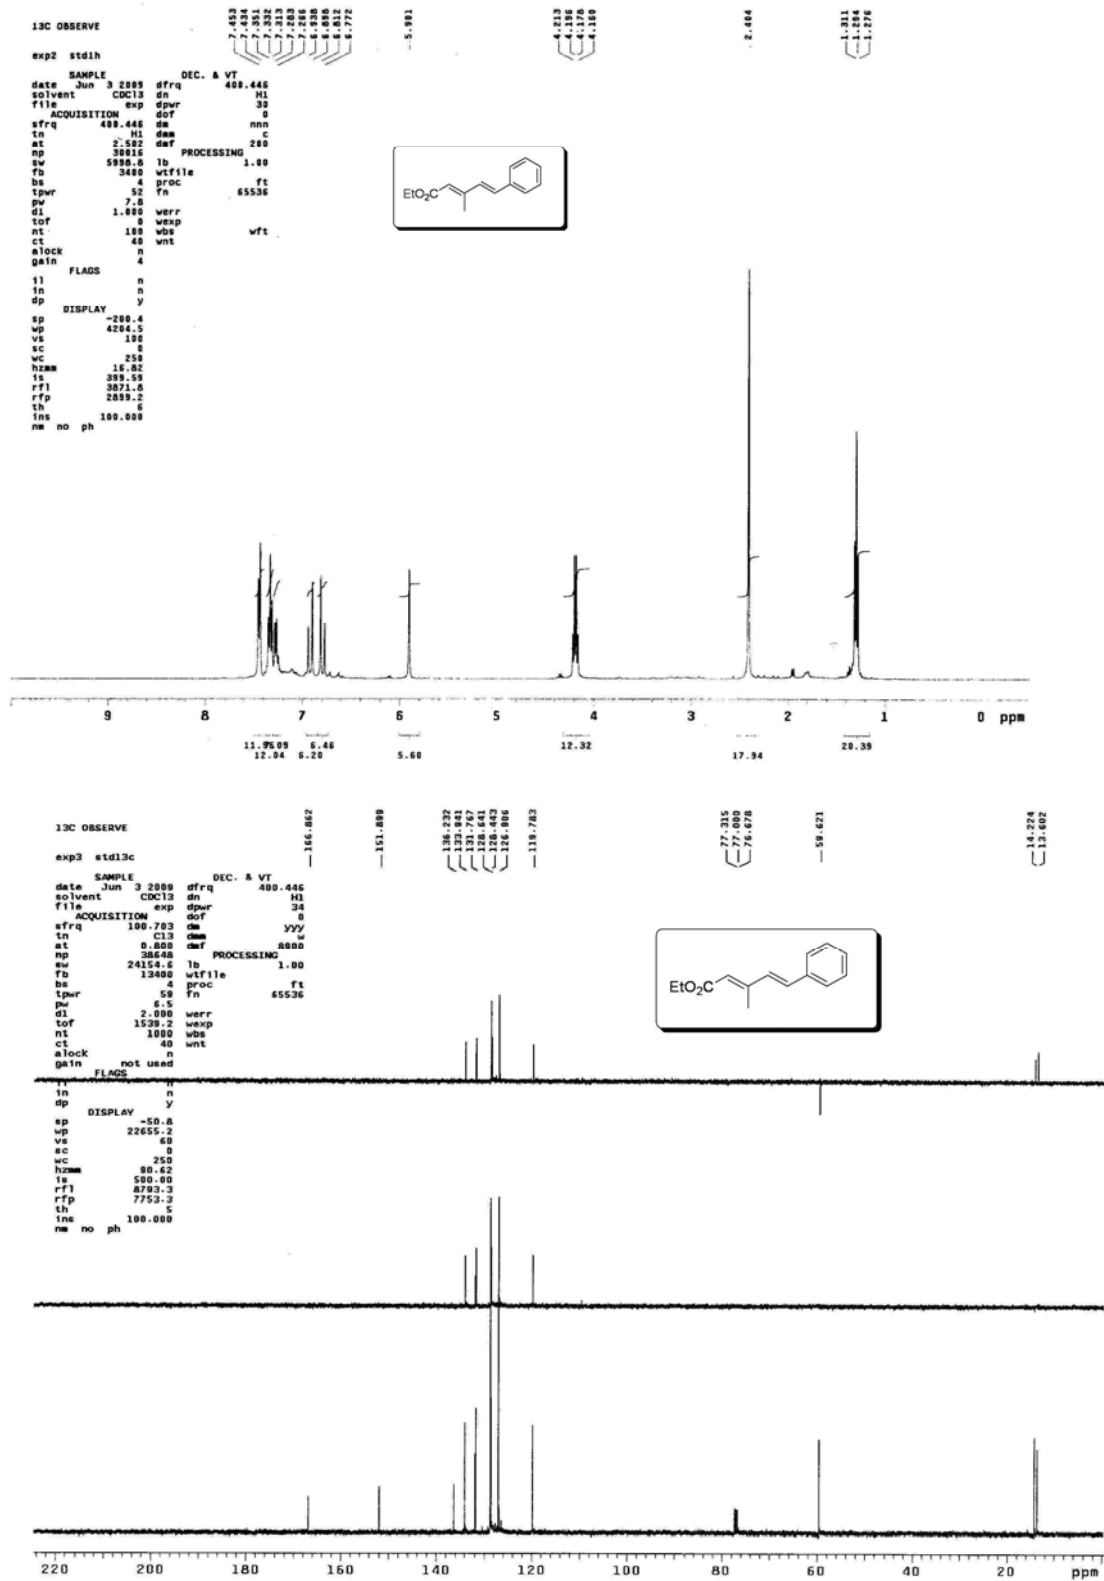

$^1\text{H}$  and  $^{13}\text{C}$  NMR spectra of compound **30**.

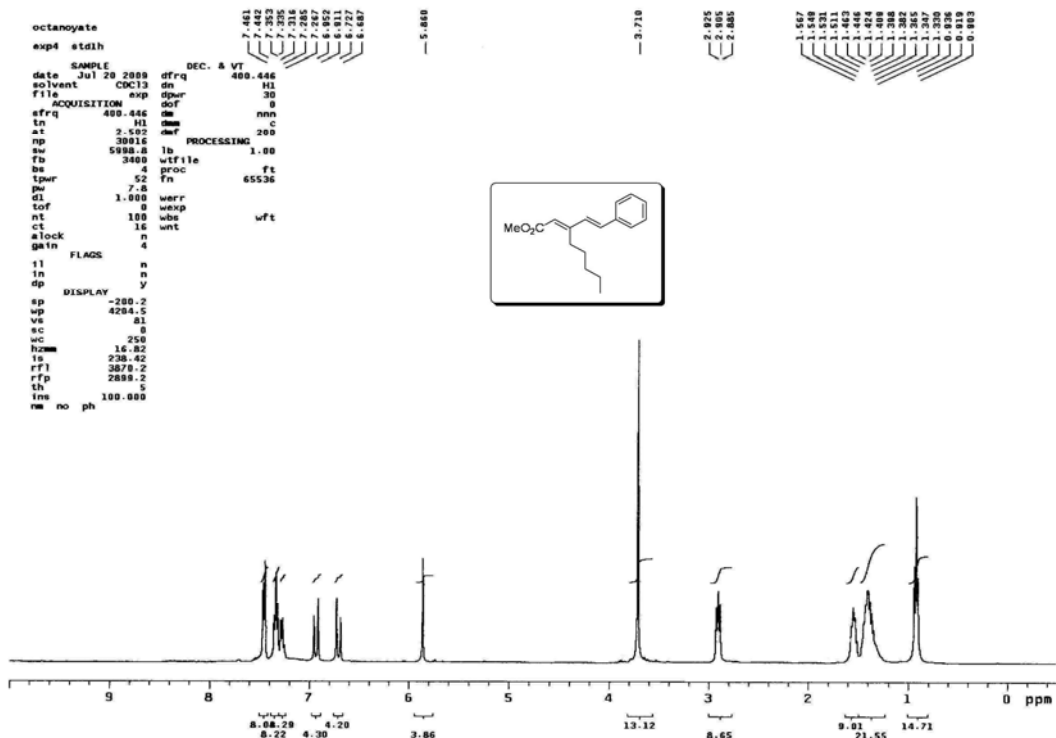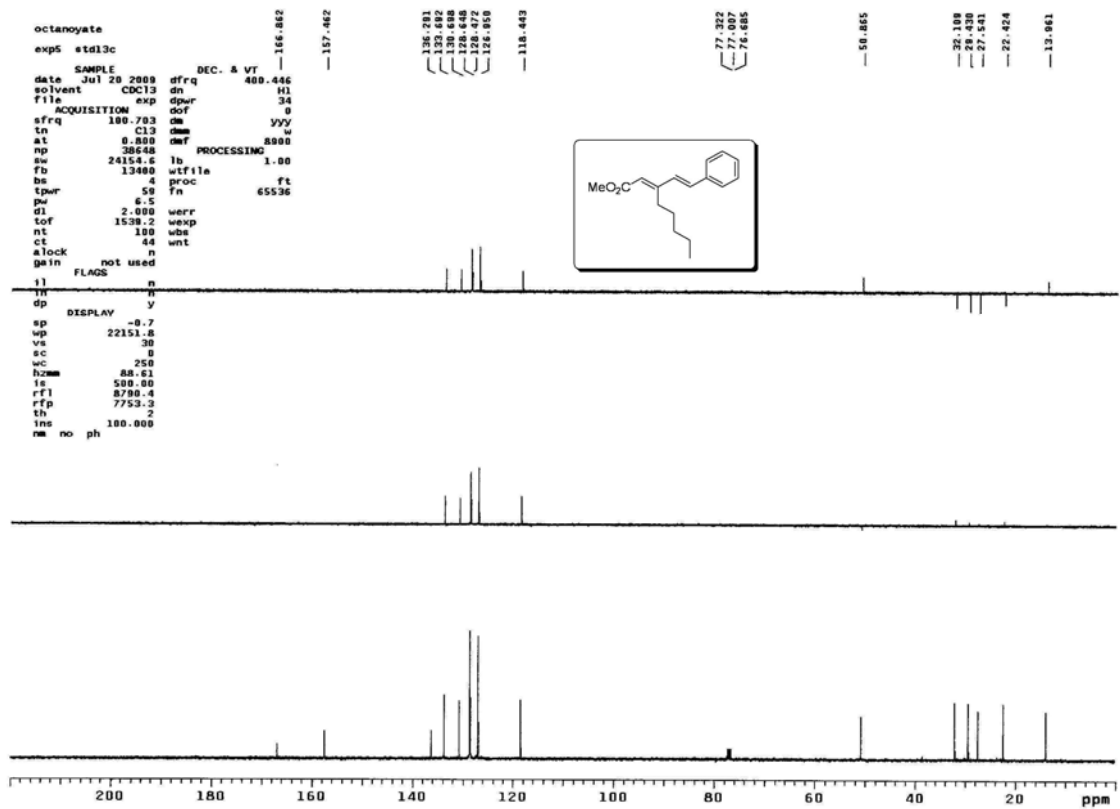

$^1\text{H}$  and  $^{13}\text{C}$  NMR spectra of compound **3p**.

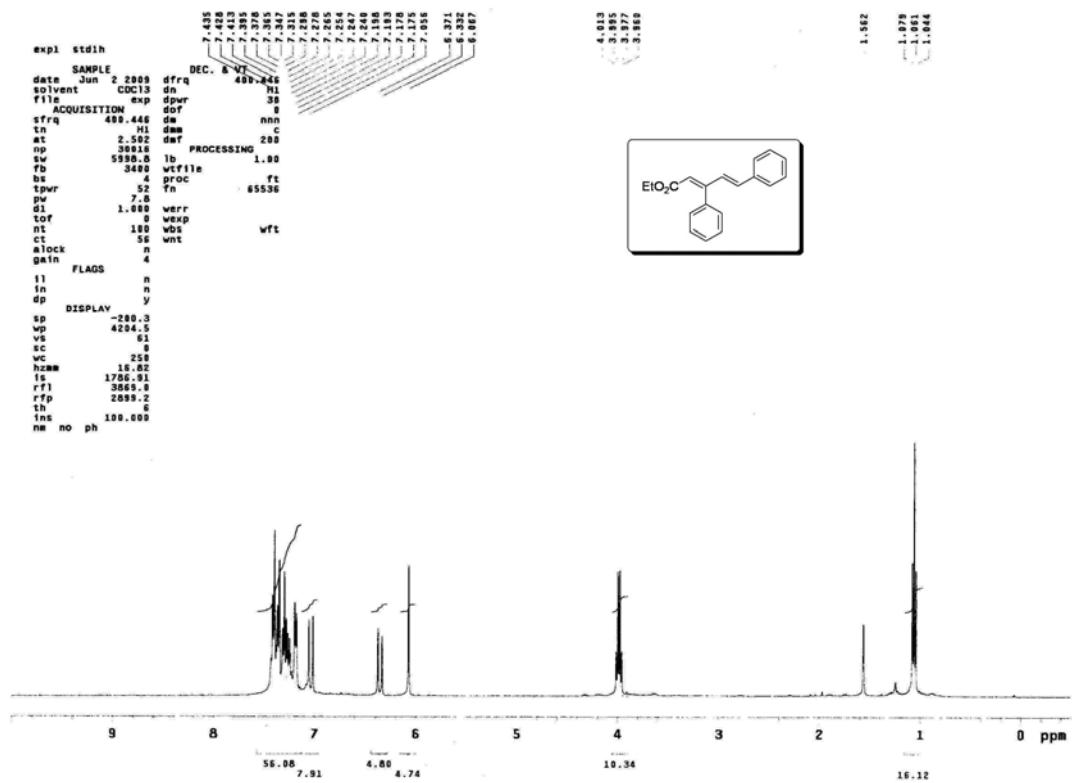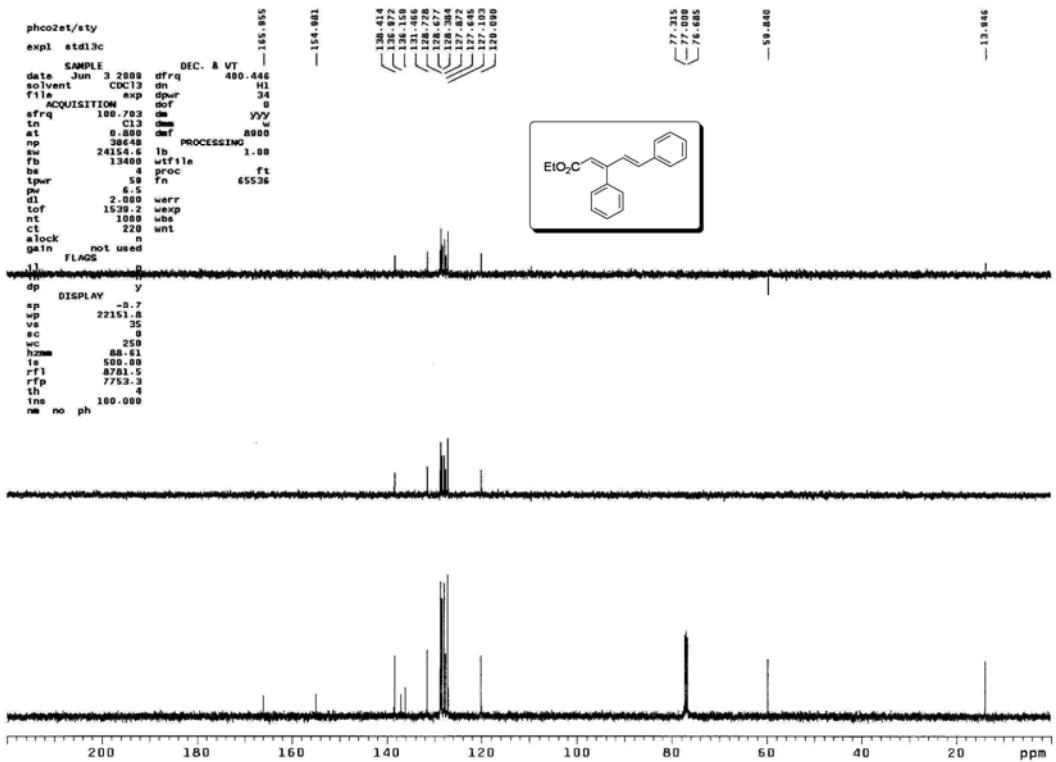

$^1\text{H}$  and  $^{13}\text{C}$  NMR spectra of compound **3q**.

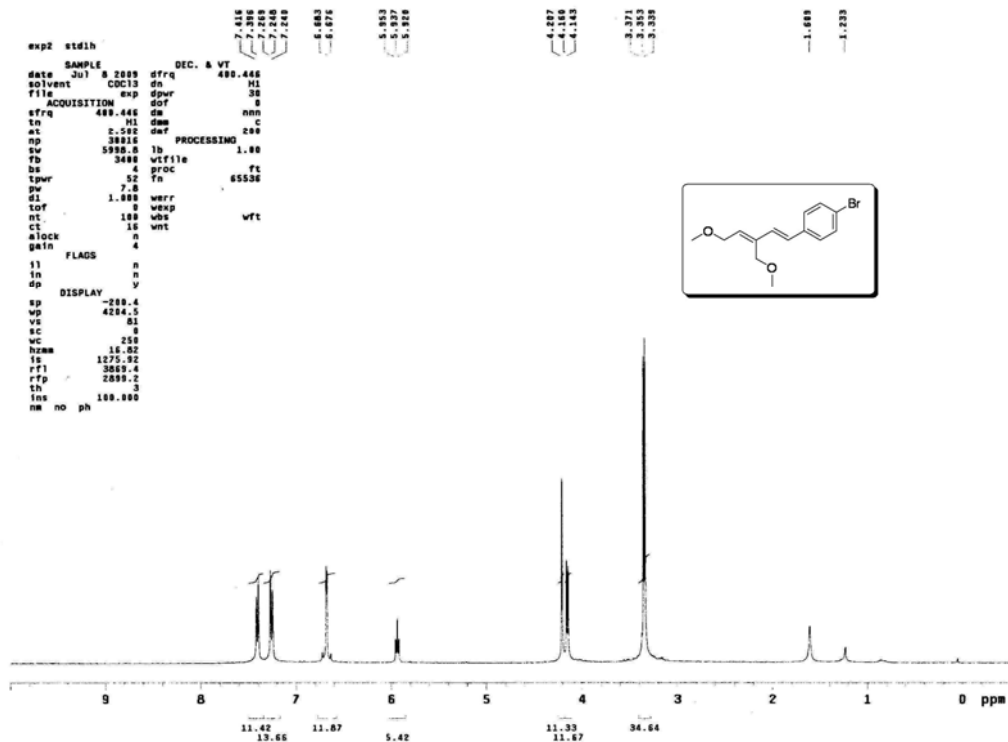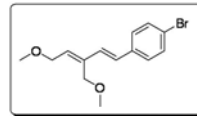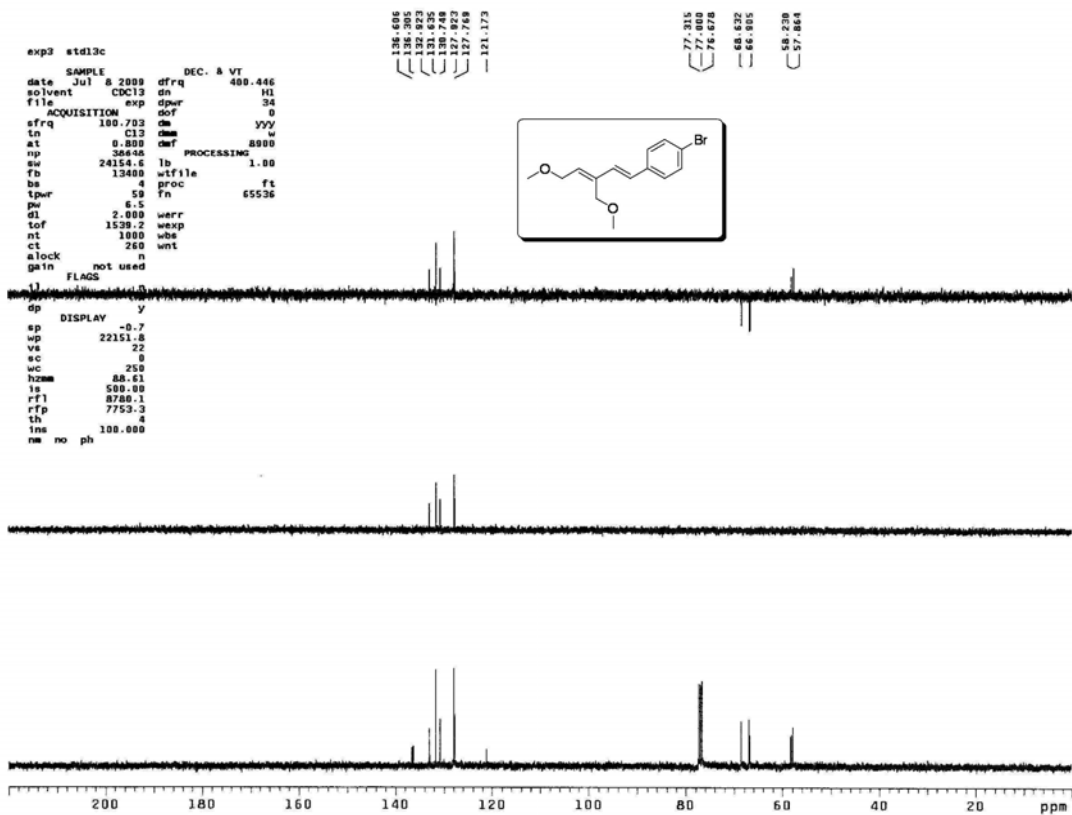

Supplement: b920071a.pdf [file b920071a.pdf]
